# Supplementary material for: Characterisation of the fibroinflammatory process involved in progression from acute to chronic pancreatitis: study protocol for a multicentre, prospective cohort study
Source: PubMed Central journal article supplement — BMJ Open. 2019 Aug 21;9(8):e028999. doi: 10.1136/bmjopen-2019-028999 (PMC6707691; doi:10.1136/bmjopen-2019-028999), 2019-08-21
Supplement: bmjopen-2019-028999.draft_revisions.pdf [file bmjopen-2019-028999.draft_revisions.pdf]

# BMJ Open

BMJ Open is committed to open peer review. As part of this commitment we make the peer review history of every article we publish publicly available.

When an article is published we post the peer reviewers' comments and the authors' responses online. We also post the versions of the paper that were used during peer review. These are the versions that the peer review comments apply to.

The versions of the paper that follow are the versions that were submitted during the peer review process. They are not the versions of record or the final published versions. They should not be cited or distributed as the published version of this manuscript.

BMJ Open is an open access journal and the full, final, typeset and author-corrected version of record of the manuscript is available on our site with no access controls, subscription charges or pay-per-view fees (<http://bmjopen.bmj.com>).

If you have any questions on BMJ Open's open peer review process please email [info.bmjopen@bmj.com](mailto:info.bmjopen@bmj.com)

# BMJ Open

## Characterization of the fibro-inflammatory process involved in progression from acute to chronic pancreatitis: study protocol for a multicentre, prospective cohort study

|                               |                                                                                                                                                                                                                                                                                                                                                                                                                                                                                                                                                                                                                                                                                                                                                                                                                                                                                                                                                                                                                                                                                                                                                                                                                                                                                                                                                                                                                                                                    |
|-------------------------------|--------------------------------------------------------------------------------------------------------------------------------------------------------------------------------------------------------------------------------------------------------------------------------------------------------------------------------------------------------------------------------------------------------------------------------------------------------------------------------------------------------------------------------------------------------------------------------------------------------------------------------------------------------------------------------------------------------------------------------------------------------------------------------------------------------------------------------------------------------------------------------------------------------------------------------------------------------------------------------------------------------------------------------------------------------------------------------------------------------------------------------------------------------------------------------------------------------------------------------------------------------------------------------------------------------------------------------------------------------------------------------------------------------------------------------------------------------------------|
| Journal:                      | <i>BMJ Open</i>                                                                                                                                                                                                                                                                                                                                                                                                                                                                                                                                                                                                                                                                                                                                                                                                                                                                                                                                                                                                                                                                                                                                                                                                                                                                                                                                                                                                                                                    |
| Manuscript ID                 | bmjopen-2019-028999                                                                                                                                                                                                                                                                                                                                                                                                                                                                                                                                                                                                                                                                                                                                                                                                                                                                                                                                                                                                                                                                                                                                                                                                                                                                                                                                                                                                                                                |
| Article Type:                 | Protocol                                                                                                                                                                                                                                                                                                                                                                                                                                                                                                                                                                                                                                                                                                                                                                                                                                                                                                                                                                                                                                                                                                                                                                                                                                                                                                                                                                                                                                                           |
| Date Submitted by the Author: | 07-Jan-2019                                                                                                                                                                                                                                                                                                                                                                                                                                                                                                                                                                                                                                                                                                                                                                                                                                                                                                                                                                                                                                                                                                                                                                                                                                                                                                                                                                                                                                                        |
| Complete List of Authors:     | <p>Novovic, Srdan; Hvidovre Hospital, Department of Gastroenterology and Gastrointestinal Surgery<br/>         Borch, Anders; Bispebjerg Hospital, Abdominal Center K<br/>         Werge, Mikkel; Hvidovre Hospital, Department of Gastroenterology and Gastrointestinal Surgery<br/>         Karran, David; Bispebjerg Hospital, Abdominal Center K<br/>         Gluud, Lise; University of Copenhagen, Gastrounit Hvidovre Hospital<br/>         Schmidt, Palle; Hvidovre Hospital, Department of Gastroenterology and Gastrointestinal Surgery<br/>         Hansen, Erik; Hvidovre Hospital, Department of Gastroenterology and Gastrointestinal Surgery<br/>         Nøjgaard, Camilla; Hvidovre Hospital, Department of Gastroenterology and Gastrointestinal Surgery<br/>         Jensen, Annette; Hvidovre Hospital, Department of Radiology<br/>         Jensen, Frank; Hvidovre Hospital, Department of Radiology<br/>         Frøkjær, Jens; Mech-Sense, Department of Radiology, Aalborg University Hospital,<br/>         Hansen, Mark; Bispebjerg Hospital, Abdominal Center K<br/>         Jensen, Lars; Bispebjerg Hospital, Abdominal Center K<br/>         Drewes, Asbjørn; Mech-Sense, Department of Gastroenterology and Hepatology, Aalborg University Hospital, ; Department of Clinical Medicine, Aalborg University,<br/>         Olesen, Søren; Aalborg University Hospital, Mech-Sense, Department of Gastroenterology and Hepatology</p> |
| Keywords:                     | chronic pancreatitis, inflammation, fibrosis, oxidative stress, pain processing                                                                                                                                                                                                                                                                                                                                                                                                                                                                                                                                                                                                                                                                                                                                                                                                                                                                                                                                                                                                                                                                                                                                                                                                                                                                                                                                                                                    |
|                               |                                                                                                                                                                                                                                                                                                                                                                                                                                                                                                                                                                                                                                                                                                                                                                                                                                                                                                                                                                                                                                                                                                                                                                                                                                                                                                                                                                                                                                                                    |

SCHOLARONE™  
Manuscripts

1  
2  
3  
4  
5  
6  
7  
8  
9  
10  
11  
12  
13  
14  
15  
16  
17  
18  
19  
20  
21  
22

# Characterization of the fibro-inflammatory process involved in progression from acute to chronic pancreatitis: study protocol for a multicentre, prospective cohort study

15 Srdan Novovic<sup>1</sup>, Anders Borch<sup>2</sup>, Mikkel Werge<sup>1</sup>, David Karran<sup>2</sup>, Lise Lotte Gluud<sup>1</sup>, Palle Nordblad Schmidt<sup>1</sup>, Erik Feldager Hansen<sup>1</sup>, Camilla Nøjgaard<sup>1</sup>, Annette Bøjer Jensen<sup>3</sup>, Frank Krieger Jensen<sup>3</sup>, Jens Brøndum Frøkjær<sup>4</sup>, Mark Berner Hansen<sup>2</sup>, Lars Nannestad Jørgensen<sup>2</sup>, Asbjørn Mohr Drewes<sup>5</sup>, Søren Schou Olesen<sup>5</sup>

23  
24  
25  
26  
27  
28  
29  
30  
31  
32

<sup>1</sup>Department of Gastroenterology and Gastrointestinal Surgery, Hvidovre University Hospital; <sup>2</sup>Abdominal center, Bispebjerg University Hospital; <sup>3</sup>Department of Radiology, Hvidovre University Hospital; <sup>4</sup>Department of Radiology, Aalborg University Hospital; <sup>5</sup>Mech-Sense & Centre for Pancreatic Diseases, Department of Gastroenterology & Hepatology, Clinical Institute, Aalborg University Hospital

33  
34  
35  
36  
37  
38

**Short title: Fibrosis and Inflammation in Pancreatitis (FIP)**

39  
40  
41  
42

**Keywords:** chronic pancreatitis, inflammation, fibrosis, oxidative stress, pain processing.

43  
44  
45  
46  
47  
48  
49  
50  
51  
52

## Correspondence

Srdan Novovic  
Department of Gastroenterology and Gastrointestinal Surgery  
Hvidovre hospital  
Kettegaard Alle 30  
2650 Hvidovre  
Tlf: +4538621350; e-mail: [srdan.novovic@regionh.dk](mailto:srdan.novovic@regionh.dk)

53  
54  
55  
56  
57  
58  
59  
60

**Word count:** 4098.

## Abstract

**Introduction:** Chronic pancreatitis (CP) is thought to present the end-stage of a continuous disease process evolving from acute pancreatitis (AP), over recurrent acute pancreatitis (RAP), to early and end-stage CP. Due to the irreversible nature of CP, early detection and prevention is key. Prospective assessment based on state-of-the-art imaging modalities as well as biochemical markers of inflammation, fibrosis and oxidative stress may provide a better understanding of the underlying pathological processes and help identify novel biomarkers of disease with the ultimate goal of early diagnosis, intervention and prevention of disease progression. This paper describes the protocol of a prospective multicentre cohort study investigating the fibro-inflammatory process involved in progression from acute to chronic pancreatitis using state-of-the-art diagnostic imaging modalities and circulating biomarkers of inflammation, fibrosis and oxidative stress.

**Methods and analysis:** We plan to include adult patients (50 in each group) with either first time AP, RAP, early CP (preserved pancreatic exocrine and endocrine function) or end-stage CP (exocrine insufficiency with or without endocrine insufficiency) recruited from outpatient clinics at the participating sites. Included patients will be followed prospectively for 15 years with advanced MRI and contrast enhanced EUS with elastography, assessment of endocrine and exocrine pancreatic function, biochemical and nutritional assessment, and evaluation of pain processing using quantitative sensory testing. Blood for a biobank will be obtained. The purpose of the biobank is to allow analyses of potential biomarkers for the progression of disease eventually leading to CP including interleukins, transforming growth factor beta-1, soluble fractalkine, monocyte chemoattractant protein 1, matrix metalloproteinases and markers of oxidative stress.

**Ethics and dissemination:** Permissions from the Regional Science Ethics committee and the Regional Data Protection Agency are obtained. We will submit the results of the study for publication in peer-reviewed journals regardless of whether the results are positive, negative or inconclusive.

1  
2  
3  
4  
5  
6  
7  
8  
9  
10  
11  
12  
13  
14  
15  
16  
17  
18  
19  
20  
21  
22  
23  
24  
25  
26  
27  
28  
29  
30  
31  
32  
33  
34  
35  
36  
37  
38  
39  
40  
41  
42  
43  
44  
45  
46  
47  
48  
49  
50  
51  
52  
53  
54  
55  
56  
57  
58  
59  
60

## Article Summary

### Strengths and limitations of this study

- The study design enables prospective, long-term characterization of patients in different phases of the pancreatitis disease spectrum.
- The project will lead to a better understanding of the fibrogenic process underlying CP and improve the understanding of changes in pain perception and nutritional aspects during the course of disease.
- The combination of diagnostic imaging, functional and biochemical parameters may enable early identification of patients at increased risk of developing chronic pancreatitis.
- As there are emerging inhibitors of pancreatic fibrosis, which potentially could impair the ongoing fibrogenesis of pancreas, this project may lead to new strategies for patient management and disease prevention.
- A limitation of the study is that “State-of-the art” imaging, functional, endoscopic and biochemical tools may change during the study period, thus making comparisons over time difficult and potentially based on outdated methods.

## Introduction

Chronic pancreatitis (CP) is a progressive fibro-inflammatory disease associated with persistent pathologic response to parenchymal injury or stress [1]. Over time, the fibro-inflammatory process can lead to irreversible fibrosis with morphological changes and destruction of acinar cells with subsequent loss of pancreatic function. Due to the irreversible nature of end-stage pancreatitis, early detection and prevention is key. A recent epidemiological study found an annual CP incidence of 7.8 per 100,000 [2]. Assuming a survival of 15–20 years, the annual prevalence should be between 120 to 143 per 100,000 [3]. However, accumulated evidence suggests that the incidence of CP is rising [4,5] and a Danish nationwide population-based cohort study showed a five-fold increased mortality rate with a life expectancy that was approximately 8 years less among CP patients compared with population controls [6]. Taken together, this illustrates the great impact CP has on health, economic, and social aspects.

Alcohol and smoking are the major aetiological risk factors of CP [7], and there seems to be an additive effect of alcohol and smoking. Other causes include hypercalcemia, hyperlipidaemia, obstruction of the biliary or pancreatic duct, autoimmune conditions, and hereditary conditions. About 20% of cases are idiopathic, but this number is likely to decrease as the understanding of the pathophysiology underlying CP evolves.

Currently the diagnosis of CP is based on a combination of symptoms, biochemical tests, and imaging. Abdominal pain is the cardinal symptom of CP and present in the majority of patients during their disease course, but the intensity and temporal pattern varies substantially. At later disease stages patients may develop diabetes, steatorrhea and weight loss, but the disease course is unpredictable in the majority of patients, thus making symptom based assessment unreliable. The biochemical tests used for assessment of CP include glycated haemoglobin [HbA<sub>1c</sub>] (endocrine pancreatic function) and faecal elastase [FE], breath test or direct pancreatic function tests (exocrine pancreatic function tests). Diagnostic imaging is used for characterisation of typical morphological changes including parenchymal lobulation, calcifications, parenchymal atrophy, pseudocysts and main pancreatic duct abnormalities. Various imaging modalities are used for assessment including computed tomography (CT), magnetic resonance imaging (MRI) and endoscopic ultrasound (EUS)[8].

1  
2  
3  
4 Some patients are diagnosed with CP without preceding attacks of acute pancreatitis (AP).  
5  
6 These patients typically present with symptoms of end stage disease including  
7  
8 steatorrhea, diabetes and chronic abdominal pain. However, a large proportion of patients  
9  
10 diagnosed with CP have a history of AP or recurrent acute pancreatitis (RAP), especially  
11  
12 when aetiology is toxic (Fig. 1). A retrospective study found that among 669 patients  
13  
14 admitted with their first episode of AP, 17% developed RAP and 8% progressed to CP  
15  
16 within 5 years [9]. These findings attest to the understanding of CP as a continuous  
17  
18 disease process evolving from AP, over RAP, to early and end-stage CP as also outlined  
19  
20 in a recent international consensus draft on a mechanistic definition of CP [1]. Importantly,  
21  
22 this understanding provides a theoretical framework for studying the fibro-inflammatory  
23  
24 processes involved in the development of CP by prospectively assessing patients admitted  
25  
26 with AP and RAP during their course of disease towards early and end-stage CP. Hence,  
27  
28 prospective assessment based on state-of-the-art imaging modalities as well as  
29  
30 biochemical markers of inflammation, fibrosis and oxidative stress may provide a better  
31  
32 understanding of the underlying pathological processes and help identifying novel  
33  
34 biomarkers of disease with the ultimate goal of early diagnosis, intervention and  
35  
36 prevention of progression.

37  
38 Overall, there is a substantial and unmet need for a better understanding and  
39  
40 characterisation of the pathological processes underlying inflammatory pancreatic  
41  
42 disorders. The present protocol provides a unique opportunity to study such changes in  
43  
44 well defined, and well characterized prospective patient cohorts.

## 45 **Current standards and challenges in assessment of pancreatitis**

### 46 **Imaging**

47  
48 Various imaging techniques can be used to characterize pancreatic morphology. CT is in  
49  
50 most cases used for the initial work-up and is particularly useful for detection of advanced  
51  
52 disease characteristics of CP including parenchymal and intraductal calcifications, gross  
53  
54 duct pathology and parenchymal atrophy [10]. Furthermore, CT is key in ruling out relevant  
55  
56 differential diagnosis including pancreatic cancer. Despite CT being the imaging modality  
57  
58 of choice for initial investigation, it cannot exclude a diagnosis of CP, nor can it be used to  
59  
60 exclusively diagnose 'early CP'.

1  
2  
3  
4 MRI based techniques including magnetic resonance cholangiopancreatography (MRCP)  
5 are more accurate for detection of pancreatic duct abnormalities (dilatations and strictures)  
6 and subtle changes of the pancreatic parenchyma and side branches, which can be  
7 attributed to early signs of CP [11]. The MR based techniques can be further refined by  
8 assessment of pancreatic gland volume and administration of secretin whereby a  
9 combined quantitative morphological and functional assessment of the pancreatic gland  
10 can be obtained. This includes characterization of subtle ductal abnormalities and  
11 pancreatic secretion. In addition, diffusion weighted imaging (DWI) can provide a proxy of  
12 fibrotic changes and emerging methods like the DIXON technique can be used to assess  
13 fat signal fraction (FSF) for evaluation of fatty infiltration of the pancreatic parenchyma.  
14 The gold standard for establishing a diagnosis of early CP imaging is currently endoscopic  
15 ultrasound (EUS). Diagnostic criteria related to the parenchyma and the pancreatic duct  
16 have been established, and in 2009 a weighted scoring system was proposed by a panel  
17 of experts, the Rosemont score [12]. Emerging endoscopic methods with assessment of  
18 pancreatic blood flow and tissue stiffness by elastography may further improve the  
19 diagnostic utility of EUS [13].  
20  
21 Taken together, a multimodal approach combining advanced MRI and EUS techniques will  
22 likely provide novel and complementary information on pancreatic morphology and  
23 function that may reflect unique aspects of the pathology underlying progressive  
24 pancreatitis disorders (AP → RAP → CP) that have not previously been identified using  
25 conventional imaging modalities.  
26  
27  
28  
29  
30  
31  
32  
33  
34  
35  
36  
37  
38  
39  
40  
41

### 42 **Circulating biomarkers of inflammation, fibrosis and oxidative stress**

43  
44 Most of our knowledge about physiological and pathophysiological mechanisms in healthy  
45 and diseased pancreas comes from experimental studies. Due to the anatomy, complexity  
46 and risk associated with direct sampling from pancreatic tissue, most of our information on  
47 human pancreas arises from circulating marker of pancreatic physiology or injury.  
48  
49  
50  
51  
52

53 **Inflammation:** The inflammatory profile characterising early stages of pancreatitis may  
54 reflect the trajectory of disease and subsequent development of fibrosis. Hence, patients  
55 with CP have increased serum levels of interleukin (IL)-6, IL-4, IL-18 [14][15][16], which  
56  
57  
58  
59  
60



1  
2  
3  
4 are implicated in the wound healing response and the progression of fibrotic disease. Also,  
5  
6 tumour necrosis factor (TNF)- $\alpha$  may be implicated in disease progression [17].  
7  
8

9  
10 **Fibrosis:** Patients with CP have elevated plasma levels of fibro genesis markers such as  
11 transforming growth factor beta-1 (TGF- $\beta$ 1), soluble fractalkine (s-FR) and monocyte  
12 chemoattractant protein 1 (MCP-1) [18][19][20]. Decreasing MCP-1 and TGF- $\beta$ 1 levels  
13 with anti-inflammatory drugs was shown to reduce the severity of CP in a caerulein-  
14 induced CP mouse model [21]. Matrix metalloproteinases (MMPs) are a group of enzymes  
15 involved in the degradation of collagen, proteoglycans, elastin and fibronectin, all of which  
16 play an important role in the remodelling of the extracellular matrix. The role of MMPs in  
17 the development of progressive fibrosis and cirrhosis is well established [22] and emerging  
18 evidence suggests that MMPs may have a similar role in CP [23]. Elevated serum MMP-  
19 9 levels have been found in patients with both AP and CP, and active form of MMP-9  
20 could be involved in the development of diabetes mellitus associated with CP [24].  
21  
22  
23  
24  
25  
26  
27  
28

29 **Oxidative stress** is a result of imbalance between reactive oxygen species and their  
30 neutralizing mechanisms, which may result in cell or tissue damage. Increased oxidative  
31 stress with the resulting formation of free radicals has been implicated in the  
32 pathophysiology of CP [25] and treatment with antioxidants has been shown to reduce  
33 disease and pain severity in randomized controlled trials [26,27], although the effects may  
34 be related to the underlying aetiology [28,29]. Recent studies have shown that oxidative  
35 stress may also be implicated in RAP [30]. Free radicals do not only exert local effect in  
36 pancreas, but are also released in systemic circulation and can thus be quantified.  
37  
38  
39  
40  
41  
42  
43

#### 44 **Pain processing and quantitative sensory testing**

45 The processing of pain in central pain pathways undergoes changes in a large proportion  
46 of patients with painful CP. These include sensitization of central pain pathways, impaired  
47 capacity of pain modulation as well as structural and functional changes in the brain [31].  
48 Although the presence of these changes is well documented in numerous cross-sectional  
49 studies, the temporal aspects of changes in pain processing during disease progression  
50 have not previously been investigated in the context of pancreatitis. Quantitative sensory  
51 testing (QST) can be used to map the pain system; the technique is based on the rationale  
52  
53  
54  
55  
56  
57  
58  
59  
60

1  
2  
3  
4 that different neural pathways and networks can be explored using standardized  
5 stimulation with simultaneous recording of the evoked pain response by psychophysical  
6 and/or objective methods [32]. Due to spinal convergence between visceral afferents from  
7 the pancreas and somatic afferents from upper abdominal skin dermatomes, somatic QST  
8 can be used to assess if the pain system is sensitized by nociceptive input from the  
9 pancreas [33]. Together with specific test paradigms (temporal summation and  
10 assessment of pain modulation) QST can be used to characterize the state of the pain  
11 system and to document if patients have abnormal central pain processing.  
12  
13  
14  
15  
16  
17  
18  
19

## 20 **Nutrition**

21 The risk factors associated with underweight and malnutrition in patients with CP are  
22 complex and likely multifactorial with the most frequently reported being pancreatic  
23 exocrine insufficiency. However, many patients lose weight early in their disease course  
24 and before evolution of pancreatic exocrine insufficiency. For example, postprandial pain,  
25 which is seen in many patients, may also limit food intake and lead to underweight and  
26 malnutrition. There is a paucity of data on this important topic, and continuous  
27 characterization of nutritional status in patients going through phases of AP, to RAP to CP  
28 may provide us with essential knowledge on metabolic processes related to inflammation  
29 and fibrosis. A combined use of bioelectrical impedance, hand-grip strength (HGS), timed  
30 up and go test (TUG), assessment of endocrine- (Hb1AC) and exocrine insufficiency (FE),  
31 and biochemical tests enables qualitative and quantitative assessment of nutritional status.  
32  
33  
34  
35  
36  
37  
38  
39  
40

## 41 **Hypotheses**

42 Current knowledge on the progression from AP to CP is mostly based on cross-sectional  
43 studies including patients with different stages of RAP and CP. By prospectively following  
44 well characterised cohorts of patients with pancreatitis at different stages (AP → RAP →  
45 early and late CP) with serial imaging (advanced MRI and EUS), profiling of fibro-  
46 inflammatory pathways using circulating biomarkers and assessment of nutritional status  
47 and pain processing using QST, this study will help elucidate the underlying  
48 pathophysiology of pancreatitis.  
49  
50  
51  
52  
53  
54  
55  
56  
57  
58  
59  
60

1  
2  
3  
4 The hypotheses of this study are:  
5

- 6 • Prospective assessment of patients progressing from AP to CP, using advanced  
7 imaging techniques and circulating biomarkers of inflammation, fibrosis and  
8 oxidative stress, can provide new mechanistic insight to the underlying fibro-  
9 inflammatory process. This knowledge may be used to design future clinical studies  
10 focusing on prevention of inflammation and fibrosis in the pancreas and other organ  
11 systems.  
12
- 13 • Changes in pain processing over time are poorly understood in patients progressing  
14 from AP to CP. This information may be used to identify patients at risk for  
15 developing a chronic pain syndrome with irreversible neuroplastic changes in the  
16 central nervous system.  
17
- 18 • Changes in nutritional state over time are poorly understood in patients progressing  
19 from AP to CP. This information may be used to identify patients at risk for  
20 developing malnutrition.  
21  
22  
23  
24  
25  
26  
27  
28

## 29 Aims

30  
31  
32 **Primary aim:** To prospectively investigate the fibro-inflammatory process involved in  
33 progression from acute to chronic pancreatitis using state-of-the-art diagnostic imaging  
34 modalities (contrast enhanced EUS, EUS guided elastography and advanced MRI) and  
35 circulating biomarkers of inflammation, fibrosis and oxidative stress.  
36  
37

38  
39 **Secondary aim:** To prospectively characterize pain processing and nutritional status in  
40 patients progressing from acute to chronic pancreatitis.  
41  
42

## 43 Methods

### 44 Study design

45  
46 Prospective cohort study including adult patients with either first time AP, RAP or CP  
47 recruited from outpatient clinics at the participating sites. The study is approved by the  
48 Danish Data Protection Agency (VD-2018-298; I-suite no.: 6542) and the Regional  
49 Committee on Health Research Ethics (Journal-no.: H-18017705). All study participants  
50 will provide written informed consent and the study will be conducted according to the  
51 Declaration of Helsinki. The study is non-interventional; all participants will be treated and  
52  
53  
54  
55  
56  
57  
58

1  
2  
3  
4 monitored according to the current best clinical evidence-based practice. The patient  
5 inclusion begins in February 2019, and the anticipated completion date is February 2034.  
6  
7

### 8 **Patient inclusion criteria**

- 9
- 10 • Age 18-70 Years
  - 11
  - 12 • **Cohort 1:** Patients with CP (N=50) of any aetiology except gallstone induced CP:  
13 25 patients with CP without exo- or endocrine insufficiency (early CP cohort); 25  
14 patients with CP and exocrine insufficiency with or without endocrine insufficiency  
15 (end-stage CP cohort). The M-ANNHEIM diagnostic criteria will be used for the  
16 definition of CP [34]; both patients with probable and definitive CP will be included  
17 to cover the full spectrum of disease.
  - 18
  - 19 • **Cohort 2:** Patients with their first attack of AP of any aetiology except gallstone  
20 induced AP (N=50). The revised Atlanta criteria for acute pancreatitis will be used  
21 as diagnostic criteria [35].
  - 22
  - 23 • **Cohort 3:** Patients with RAP (N=50) except gallstone induced RAP. RAP is defined  
24 as two or more cases of AP as diagnosed by the revised Atlanta Criteria [35].  
25  
26  
27  
28  
29  
30  
31

### 32 **Patient exclusion criteria**

33 Patients with the following conditions will be excluded from participation in the study:

- 34
- 35 a. Pregnant or lactating patients
  - 36
  - 37 b. Patients in whom MRI is contra-indicated (metallic implants, pacemaker,  
38 implantable cardioverter defibrillator, claustrophobia)
  - 39
  - 40 c. Patients with chronic liver disease, chronic renal failure, malignancy, chronic  
41 inflammatory bowel syndrome, chronic obstructive lung disease, pulmonary fibrosis.  
42 If the patient develops any of the listed diseases during the study period they will  
43 continue their participation in the study.
  - 44
  - 45 d. Patients treated with anti-inflammatory drugs of any kind at the time of inclusion:  
46 local or systemic corticosteroids, NSAID's, salazopyrins or other. However, once  
47 included, they will continue their participation even though they receive treatment  
48 with anti-inflammatory drugs.  
49  
50  
51  
52  
53  
54  
55  
56  
57  
58  
59  
60

1  
2  
3  
4 **Healthy controls:** Fifty sex- and age matched healthy controls without any previous  
5 history of pancreatic or gastrointestinal disease will be included.  
6  
7

#### 8 **Sample size, time schedule and follow up**

9  
10 The present study is observational. No previous long-term studies have evaluated the  
11 fibro-inflammatory process associated with the development of CP and we were therefore  
12 unable to undertake a valid sample size calculation. Consequently, the sample size was  
13 set to 50 participants in each cohort, assuming that 20-30% of participants in cohort 2 and  
14 3 would develop CP [36,37] . Based on previous cohort studies from our departments, we  
15 expected that we would be able to reach our sample size during an inclusion period of two  
16 years.  
17  
18

19 Included patients will be followed up prospectively for 15 years. An interim analysis,  
20 assessing both clinical, functional, imaging and biochemical parameters will be performed  
21 5 years after inclusion. All three cohorts will follow the same time schedule and plan for  
22 follow up as outlined in Table 1.  
23  
24

25 Included patients will be evaluated during the quiescent phase; an acute attack of  
26 pancreatitis or exacerbation in CP requiring admission will lead to a quarantine period of 4  
27 weeks before evaluation by the protocol can be performed. Resolution of pancreatitis will  
28 be documented by assessment of plasma amylase and CRP.  
29  
30

31 On inclusion, review of medical history including medication and physical examination will  
32 be performed. The following patient characteristics will be recorded: age at inclusion;  
33 gender; date the patient was diagnosed with AP/RAP/CP; aetiology of pancreatitis;  
34 previous and current use of tobacco and alcohol; presence of diabetes mellitus and other  
35 comorbidities; medications. Advanced MRI and contrast enhanced EUS with elastography  
36 will be used to characterize pancreatic morphology (Table 2). Endocrine and exocrine  
37 pancreatic function will be characterized by Hb1AC and faecal elastase and routine  
38 biochemical tests including white blood count, haemoglobin, platelets, sodium, potassium,  
39 urea, creatinine, C-reactive protein, albumin, ALT, amylase, alkaline phosphatase,  
40 bilirubin, INR, calcium, phosphate, magnesium, cobalamin, vitamin-D, PTH will be  
41 obtained. In addition to routine biochemical tests, five blood samples (5x14 ml of EDTA  
42 blood) will be deposited in a biobank for future evaluation of biomarkers of inflammation,  
43 fibrosis, and oxidative stress (Table 3). Nutritional assessment and evaluation of pain  
44  
45  
46  
47  
48  
49  
50  
51  
52  
53  
54  
55  
56  
57  
58

1  
2  
3  
4 processing by QST will be performed, and the measurement variables reported in Table 4  
5 will be recorded.  
6  
7  
8

9 On subsequent yearly visits review of medical history including medication and physical  
10 examination will be performed. Endocrine and exocrine pancreatic function will be  
11 reassessed together with the routine biochemical tests outlined above. Five blood samples  
12 (5x14 ml of EDTA blood) will be deposited in a biobank for future evaluation of circulating  
13 biomarkers and nutritional assessment and evaluation of pain processing by QST will be  
14 performed as described for the inclusion visit. In addition to the yearly assessments,  
15 patients will undergo advanced MRI and contrast enhanced EUS as described at the  
16 inclusion visit every second year.  
17  
18  
19  
20  
21  
22  
23

### 24 **Biobank**

25 Five blood samples (5x14 ml of EDTA blood) will be deposited in a biobank on the day of  
26 inclusion, and subsequently on a yearly basis for 15 years. The purpose of the biobank is  
27 to allow analyses of potential biomarkers for the progression of disease eventually leading  
28 to CP. Analyses of biomarkers will only be conducted following approval from the Regional  
29 Committee on Health Research Ethic. The analyses will be conducted before January 1<sup>th</sup>,  
30 2040 (the termination date). Any remaining blood will be destroyed.  
31  
32  
33  
34  
35  
36  
37  
38

### 39 **Study procedures:**

#### 40 **Magnetic resonance imaging**

41 MRI is performed in collaboration with the radiological departments of the participating  
42 institutions. A common MRI protocol is used at all participating sites; the protocol has been  
43 described in detail previously [8,40].  
44  
45  
46  
47  
48

#### 49 **Endoscopic ultrasound**

50 EUS is performed under conscious sedation with fasting (min 6 hours) patient lying on the  
51 left side, and under continuous monitoring of pulse, blood pressure and oxygenation. EUS  
52 B-mode is applied to calculate Rosemont score (performed before further examination).  
53 Ten seconds sequences from the body and head of the pancreas are recorded. From  
54  
55  
56  
57  
58

1  
2  
3  
4 stomach, elastography is applied on pancreatic body: 10 seconds loop will be recorded  
5 with three images and a histogram. Contrast enhanced EUS is performed by a bolus  
6 administration of 2,4 ml SonoVue®. A film sequence of 90 seconds is recorded.  
7  
8  
9

### 10 11 **Circulating biomarkers**

12 Venous blood samples are drawn from an antecubital vein in 14 mL EDTA tubes (15%  
13 0.084 mL) and gently mixed. Following this procedure, the plasma is isolated and stored at  
14 -80° C until subsequent analysis.  
15  
16  
17

### 18 19 **Quantitative sensory testing**

20  
21 *Pressure algometry:* The pressure pain detection threshold (pPDT) and pressure pain  
22 tolerance threshold (pPTT) are determined on six different sites, corresponding to the  
23 somatic dermatomes above the clavicle (C5), middle of the anterior axillary fold (T4),  
24 dorsum (T10(D)), spina iliaca anterior superior (L1), rectus femoris (L4), and the  
25 abdominal pancreatic area (T10(P)). Pressure algometry is performed using an electronic  
26 pressure algometer (Somedic AB, Stockholm, Sweden), with a surface area of 1 cm<sup>2</sup>.  
27 Pressure is increased at a rate of 30 kPa/sec until pPDT and pPTT is reached, and  
28 subjects are instructed to press a button at this point, which stops the stimulation, and the  
29 corresponding pressure (kPa) is recorded.  
30  
31  
32  
33  
34  
35  
36  
37

38  
39 *Conditioned pain modulation (CPM):* To induce CPM, a cold pressor test is applied as the  
40 conditioning stimulus and pressure stimulations are used as test stimuli. Pressure  
41 stimulation is applied at the on the non-dominant rectus femoris until subjects reach the  
42 PTT using the equipment and procedure described above. The cold pressor test is  
43 performed by asking the subject to immerse their dominant hand in cooled water (2 °C) for  
44 2 minutes, or less if the evoked pain is considered to be intolerable. The CPM effect is  
45 assessed as the absolute and relative change in PTT before and after the cold pressor  
46 test.  
47  
48  
49  
50  
51  
52

53  
54 *Temporal summation:* In this test, the perceived intensity of a single pinprick stimulus  
55  
56  
57  
58  
59  
60

1  
2  
3  
4 of 256 mN, is tested over the epigastric area (T10) and the dominant forearm and  
5 compared with that of a series of 10 repetitive pinprick stimuli of the same physical  
6 intensity (1/s applied within an area of 1 cm<sup>2</sup>). The subject is asked to give a pain rating  
7 representing the single stimulus, and the estimated mean over the whole series of 10  
8 stimuli using a '0–10' numerical rating scale (NRS). The temporal summation ratio is  
9 calculated as the absolute and relative change in pain scores to single and repetitive  
10 pinprick stimulations. Pin pricks are applied using a modified von Frey hairs (Optihair2-Set,  
11 Marstock Nervtest, Germany).

### 12 13 14 15 16 17 18 19 20 **Nutritional assessment**

21 *Body composition:* Bioelectrical impedance analysis enables a fast and accurate  
22 measurement of body compartments. For the purpose of this study, bioelectrical  
23 impedance will be assessed by the seca medical Body Composition Analyzer 514/515  
24 (seca gmbh & co. kg, Hamburg) or BioScan 920-II (Maltron, Essex, UK). The analyser  
25 consists of a platform with an integrated scale, a handrail system, and a display and  
26 operation unit. The device uses four pairs of electrodes that are positioned at each hand  
27 and foot, with one electrode in each pair through which the electrical current enters the  
28 limb and the other electrode detects the voltage drop. Analysis time is 20-30 seconds.

29  
30  
31  
32  
33  
34  
35  
36  
37 *Hand grip strength:* Muscle strength is determined by hand grip strength measured to the  
38 nearest kilogram using a hydraulic hand dynamometer (NC70142, North Coast Medical,  
39 Arcata, CA, USA or Jamar® Smart Hand Dynamometer, Patterson medical, Warrenville, IL,  
40 USA). The dynamometer is held in the second handle position and the patient is instructed  
41 to sit on a chair with the shoulder neutrally rotated, holding the elbow bend 90° and the  
42 wrist in neutral position. Hand grip strength is measured 3 times for each hand;  
43 assessments are separated by intervals of approximately 10 seconds. The highest value  
44 for each hand is recorded and the mean value is calculated.

45  
46  
47  
48  
49  
50  
51  
52  
53 *Timed up-and-go test:* Muscle function is characterized by the timed up-and-go test (TUG).  
54 This test is performed and reported (seconds) as the time it takes a patient to get up from  
55 sitting position on a chair, walk three meters, turn around, walk back to the chair, and sit  
56 down.  
57  
58



## Questionnaires

*Quality of life:* The EORCT QLQ-C30 questionnaire is used to document life quality, physical function, and a number of other health-related parameters [41]. The questionnaire has been validated specifically for assessment of patients with CP and is composed of single-item measures and multi-item scales with scores ranging from 0 to 100 after linear transformation of the raw score [42]. A high score for a functional scale represents a high level of functioning, as does a high score for the global health status, while a high score for the symptom items represents a high level of symptomatology.

*Pain symptoms:* The brief pain inventory short form is used to document the patients pain symptoms and its interference with daily activities (interference score) [43].

## Ethics and dissemination

This study will be conducted according to the Danish national legislation on health. Permissions from the Regional Science Ethics committee and the Regional Data Protection Agency are obtained. The project will lead to better understanding of fibrogenic process that leads to CP and better understanding of changes in pain perception and nutritional aspects during the course of the disease. The combination of diagnostic imaging and biochemical parameters will enable improved identification of those patients who are at particular risk of developing early chronic pancreatitis. The improvement in identification is vital, as there are emerging inhibitors of fibrosis, which potentially could impair the ongoing fibrogenesis of pancreas. Hence, the project will lead to new strategies for patient management. Socio-economically, the results of this study may lead to reduced costs for hospitalizations and accidents related to CP. The techniques developed in the project period may also be used to understand and evaluate the fibrogenic processes in other organs, primarily the liver.

The investigations and examinations that are planned in present protocol are all a part of existing routine work-up. The major change associated with the participation in the study is that the examinations are scheduled at regular time intervals. Blood for the purpose of biobank will be drawn simultaneously with the routine blood tests. Faecal elastase, bioelectrical impedance, hand-grip test, timed-up-and-go test, quantitative sensory testing and MRI are not associated with any risks. The endoscopic ultrasound can be associated

1  
2  
3  
4 with discomfort and in very rare cases with serious complications such as perforation of  
5 esophagus, stomach or duodenum.  
6

7  
8 The study may contain several combinations of data that may be written as papers in peer  
9 reviewed international journals. We will publish the study results regardless of whether the  
10 results are positive, negative or inconclusive.  
11  
12  
13

### 14 **Author contributions**

15  
16 All authors made substantial contributions to the design of the study. **SN, LLG** and **SSO**  
17 contributed to drafting the protocol and revising it critically for important intellectual  
18 content. **ABJ, JBF** and **FKJ** contributed with important aspects on diagnostic imaging. **DK,**  
19 **PNS** and **EFH** contributed with important aspects on endoscopic techniques. **MW, AB,**  
20 **CN, MBH, LNJ** and **AMD** contributed critical revisions to the draft for important intellectual  
21 content. All authors reviewed and approved the final version submitted for publication.  
22  
23  
24  
25  
26  
27

### 28 **Conflicts of interest**

29  
30 None to declare.  
31  
32

### 33 **Funding**

34  
35 This research received no specific grant from any funding agency in the public,  
36 commercial or not-for-profit sectors.  
37  
38  
39  
40  
41  
42  
43  
44  
45  
46  
47  
48  
49  
50  
51  
52  
53  
54  
55  
56  
57  
58  
59  
60

## References

- [1] Whitcomb DC, Frulloni L, Garg P, Greer JB, Schneider A, Yadav D, et al. Chronic pancreatitis: An international draft consensus proposal for a new mechanistic definition. *Pancreatology* 2016;16:218–24. doi:10.1016/j.pan.2016.02.001.
- [2] Levy P, Barthet M, Mollard BR, Amouretti M, Marion-Audibert AM, Dyard F. Estimation of the prevalence and incidence of chronic pancreatitis and its complications. *Gastroenterol Clin Biol* 2006;30:838-44
- [3] Lévy P, Domínguez-Muñoz E, Imrie C, Löhr M, Maisonneuve P. Epidemiology of chronic pancreatitis: Burden of the disease and consequences. *United Eur Gastroenterol J* 2014;2:345–54. doi:10.1177/2050640614548208.
- [4] Jupp J, Fine D, Johnson CD. The epidemiology and socioeconomic impact of chronic pancreatitis. *Best Pract Res Clin Gastroenterol* 2010;24:219–31. doi:10.1016/j.bpg.2010.03.005.
- [5] Nøjgaard C, Bendtsen F, Becker U, Andersen JR, Holst C, Matzen P. Danish patients with chronic pancreatitis have a four-fold higher mortality rate than the Danish population. *Clin Gastroenterol Hepatol* 2010;8:384–90. doi:10.1016/j.cgh.2009.12.016.
- [6] Bang UC, Benfield T, Hyldstrup L, Bendtsen F, Beck Jensen JE. Mortality, cancer, and comorbidities associated with chronic pancreatitis: A Danish nationwide matched-cohort study. *Gastroenterology* 2014;146:989–94. doi:10.1053/j.gastro.2013.12.033.
- [7] Etemad B, Whitcomb DC. Chronic pancreatitis: Diagnosis, classification, and new genetic developments. *Gastroenterology* 2001;120:682–707. doi:10.1053/gast.2001.22586.
- [8] Madzak A, Olesen SS, Wathle GK, Haldorsen IS, Drewes AM, Frøkjær JB. Secretin-Stimulated Magnetic Resonance Imaging Assessment of the Benign Pancreatic Disorders: Systematic Review and Proposal for a Standardized Protocol. *Pancreas* 2016;45:1092–103. doi:10.1097/MPA.0000000000000606.
- [9] Ahmed Ali U, Issa Y, Hagensars JC, Bakker OJ, van Goor H, Nieuwenhuijs VB, et

1  
2  
3  
4 al. Risk of Recurrent Pancreatitis and Progression to Chronic Pancreatitis After a  
5 First Episode of Acute Pancreatitis. *Clin Gastroenterol Hepatol* 2016;14:738–46.  
6 doi:10.1016/j.cgh.2015.12.040.  
7

- 8  
9 [10] Löhr JM, Dominguez-Munoz E, Rosendahl J, Besselink M, Mayerle J, Lerch MM, et  
10 al. United European Gastroenterology evidence-based guidelines for the diagnosis  
11 and therapy of chronic pancreatitis (HaPanEU). *United Eur Gastroenterol J*  
12 2017;5:153–99. doi:10.1177/2050640616684695.  
13  
14 [11] Robinson PJA, Sheridan MB. Abdominal radiology Review article Pancreatitis :  
15 computed tomography and magnetic resonance imaging 2000;408:401–8.  
16  
17 [12] Catalano MF, Sahai A, Levy M, Romagnuolo J, Wiersema M, Brugge W, et al. EUS-  
18 based criteria for the diagnosis of chronic pancreatitis: the Rosemont classification.  
19 *Gastrointest Endosc* 2009;69:1251–61. doi:10.1016/j.gie.2008.07.043.  
20  
21 [13] Kawada N, Tanaka S. Elastography for the pancreas: Current status and future  
22 perspective. *World J Gastroenterol* 2016;22:3712–24. doi:10.3748/wjg.v22.i14.3712.  
23  
24 [14] Pedersen N, Larsen S, Seidelin JB, Nielsen OH. Alcohol modulates circulating levels  
25 of interleukin-6 and monocyte chemoattractant protein-1 in chronic pancreatitis.  
26 *Scand J Gastroenterol* 2004;39:277–82. doi:10.1080/00365520310008296.  
27  
28 [15] Sandström A, Andersson R, Segersvärd R, Löhr M, Borrebaeck CAK, Wingren C.  
29 Serum proteome profiling of pancreatitis using recombinant antibody microarrays  
30 reveals disease-associated biomarker signatures. *Proteomics - Clin Appl*  
31 2012;6:486–96. doi:10.1002/prca.201200051.  
32  
33 [16] Schneider A, Haas SL, Hildenbrand R, Siegmund S, Reinhard I, Nakovics H, et al.  
34 Enhanced expression of interleukin-18 in serum and pancreas of patients with  
35 chronic pancreatitis. *World J Gastroenterol* 2006;12:6507–14.  
36  
37 [17] Sri Manjari K, Jyothy A, Shravan Kumar P, Prabhakar B, Uma Devi M, Ramanna M,  
38 et al. A single-nucleotide polymorphism in tumor necrosis factor- $\alpha$  (-308 G/A) as a  
39 biomarker in chronic pancreatitis. *Gene* 2014;539:186–9.  
40 doi:10.1016/j.gene.2014.02.014.  
41  
42 [18] Kamath MG, Pai CG, Kamath A, Kurien A. Monocyte chemoattractant protein-1,  
43 transforming growth factor- $\beta$ 1, nerve growth factor, resistin and hyaluronic acid as  
44 serum markers: comparison between recurrent acute and chronic pancreatitis.  
45 *Hepatobiliary Pancreat Dis Int* 2016;15:209–15. doi:10.1016/S1499-3872(15)60029-  
46  
47  
48  
49  
50  
51  
52  
53  
54  
55  
56  
57  
58  
59  
60

1  
2  
3  
4  
5  
6  
7  
8  
9  
10  
11  
12  
13  
14  
15  
16  
17  
18  
19  
20  
21  
22  
23  
24  
25  
26  
27  
28  
29  
30  
31  
32  
33  
34  
35  
36  
37  
38  
39  
40  
41  
42  
43  
44  
45  
46  
47  
48  
49  
50  
51  
52  
53  
54  
55  
56  
57  
58  
59  
60

7.

- [19] Ceyhan GO, Deucker S, Demir IE, Erkan M, Schmelz M, Bergmann F, et al. Neural fractalkine expression is closely linked to pain and pancreatic neuritis in human chronic pancreatitis. *Lab Invest* 2009;89:347–61. doi:10.1038/labinvest.2008.170.
- [20] Ito T. Can measurement of chemokines become useful biological and functional markers of early-stage chronic pancreatitis? *J Gastroenterol* 2007;42:72–7. doi:10.1007/s00535-006-1929-4.
- [21] Bai H, Chen X, Zhang L, Dou X. The effect of sulindac , a non-steroidal anti-inflammatory drug , attenuates inflammation and fibrosis in a mouse model of chronic pancreatitis 2012.
- [22] Roeb E. Matrix metalloproteinases and liver fibrosis (translational aspects). *Matrix Biol* 2017. doi:10.1016/j.matbio.2017.12.012.
- [23] Kurzepa J, M A, Czechowska G, Kurzepa J, Celiński K, Kazmierak W, et al. Role of MMP-2 and MMP-9 and their natural inhibitors in liver fibrosis, chronic pancreatitis and non-specific inflammatory bowel diseases. *Hepatobiliary Pancreat Dis Int* 2014;13:570–9. doi:10.1016/S1499-3872(14)60261-7.
- [24] Descamps FJ, Van den Steen PE, Martens E, Ballaux F, Geboes K, Opdenakker G. Gelatinase B is diabetogenic in acute and chronic pancreatitis by cleaving insulin. *FASEB J* 2003;17:887–9. doi:10.1096/fj.02-0725fje.
- [25] Tandon RK, Garg PK. Oxidative Stress in Chronic Pancreatitis: Pathophysiological Relevance and Management. *Antioxid Redox Signal* 2011;15:2757–66. doi:10.1089/ars.2011.4115.
- [26] Uden S, Bilton D, Nathan L, Hunt LP, Main C, Braganza JM. Antioxidant therapy for recurrent pancreatitis: placebo-controlled trial. *Aliment Pharmacol Ther* 1990;4:357–71.
- [27] Bhardwaj P, Garg PK, Maulik SK, Saraya A, Tandon RK, Acharya SK. A randomized controlled trial of antioxidant supplementation for pain relief in patients with chronic pancreatitis. *Gastroenterology* 2009;136:149–159.e2.
- [28] Forsmark CE, Liddle RA. The challenging task of treating painful chronic pancreatitis. *Gastroenterology* 2012;143:533–5.
- [29] Siriwardena AK, Mason JM, Sheen AJ, Makin AJ, Shah NS. Antioxidant therapy does not reduce pain in patients with chronic pancreatitis: the ANTICIPATE study.

- 1  
2  
3  
4 Gastroenterology 2012;143:655–63.e1. doi:10.1053/j.gastro.2012.05.046.
- 5  
6 [30] Bopanna S, Nayak B, Prakash S, Shalimar, Mahapatra SJ, Garg PK. Increased  
7  
8 oxidative stress and deficient antioxidant levels may be involved in the pathogenesis  
9  
10 of idiopathic recurrent acute pancreatitis. *Pancreatology* 2017;17:529–33.  
11  
12 doi:10.1016/j.pan.2017.06.009.
- 13 [31] Poulsen JL, Olesen SS, Malver LP, Frokjaer JB, Drewes AM. Pain and chronic  
14  
15 pancreatitis: a complex interplay of multiple mechanisms. *World J Gastroenterol*  
16  
17 2013;19:7282–91. doi:10.3748/wjg.v19.i42.7282.
- 18 [32] Bouwense SA, de Vries M, Schreuder LT, Olesen SS, Frokjaer JB, Drewes AM, et  
19  
20 al. Systematic mechanism-orientated approach to chronic pancreatitis pain. *World J*  
21  
22 *Gastroenterol* 2015;21:47–59. doi:10.3748/wjg.v21.i1.47.
- 23 [33] Olesen SS, Graversen C, Bouwense SAW, van Goor H, Wilder-Smith OHG, Drewes  
24  
25 AM. Quantitative sensory testing predicts pregabalin efficacy in painful chronic  
26  
27 pancreatitis. *PLoS One* 2013;8:e57963. doi:10.1371/journal.pone.0057963.
- 28 [34] Schneider A, Löhr JM, Singer M V. The M-ANNHEIM classification of chronic  
29  
30 pancreatitis: Introduction of a unifying classification system based on a review of  
31  
32 previous classifications of the disease. *J Gastroenterol* 2007;42:101–19.  
33  
34 doi:10.1007/s00535-006-1945-4.
- 35 [35] Banks P a, Bollen TL, Dervenis C, Gooszen HG, Johnson CD, Sarr MG, et al.  
36  
37 Classification of acute pancreatitis--2012: revision of the Atlanta classification and  
38  
39 definitions by international consensus. *Gut* 2013;62:102–11. doi:10.1136/gutjnl-  
40  
41 2012-302779.
- 42 [36] Kalaria R, Abraham P, Desai DC, Joshi A, Gupta T, Abraham P. Rate of recurrence  
43  
44 in Indian patients presenting with acute pancreatitis and identification of chronicity  
45  
46 on follow up : Possible risk factors for progression 2018:10–5.
- 47 [37] Sankaran SJ, Xiao AY, Wu LM, Windsor JA, Forsmark CE, Petrov MS. Frequency of  
48  
49 Progression from Acute to Chronic Pancreatitis and Risk Factors: A Meta-analysis.  
50  
51 *Gastroenterology* 2015;149:1490–1500.e1. doi:10.1053/j.gastro.2015.07.066.
- 52 [38] Schreyer AG, Jung M, Riemann JF, Niessen C, Pregler B, Grenacher L, et al. S3  
53  
54 guideline for chronic pancreatitis - Diagnosis, classification and therapy for the  
55  
56 radiologist. *RoFo Fortschritte Auf Dem Gebiet Der Rontgenstrahlen Und Der Bildgeb*  
57  
58 *Verfahren* 2004;186:1002–8. doi:10.1055/s-0034-1385005.

1  
2  
3  
4  
5  
6  
7  
8  
9  
10  
11  
12  
13  
14  
15  
16  
17  
18  
19  
20  
21  
22  
23  
24  
25  
26  
27  
28  
29  
30  
31  
32  
33  
34  
35  
36  
37  
38  
39  
40  
41  
42  
43  
44  
45  
46  
47  
48  
49  
50  
51  
52  
53  
54  
55  
56  
57  
58  
59  
60

- [39] Kuwahara T, Hirooka Y, Kawashima H, Ohno E, Ishikawa T, Kawai M, et al. Quantitative diagnosis of chronic pancreatitis using EUS elastography. *J Gastroenterol* 2017;52:868–74. doi:10.1007/s00535-016-1296-8.
- [40] Madzak A, Olesen SS, Lykke Poulsen J, Bolvig Mark E, Mohr Drewes A, Frøkjær JB. MRI assessed pancreatic morphology and exocrine function are associated with disease burden in chronic pancreatitis. *Eur J Gastroenterol Hepatol* 2017;29. doi:10.1097/MEG.0000000000000955.
- [41] Aaronson NK, Ahmedzai S, Bergman B, Bullinger M, Cull A, Duez NJ, et al. The European Organization for Research and Treatment of Cancer QLQ-C30: a quality-of-life instrument for use in international clinical trials in oncology. *J Natl Cancer Inst* 1993;85:365–76.
- [42] Fitzsimmons D, Kahl S, Butturini G, Van Wyk M, Bornman P, Bassi C, et al. Symptoms and quality of life in chronic pancreatitis assessed by structured interview and the EORTC QLQ-C30 and QLQ-PAN26. *Am J Gastroenterol* 2005;100:918–26. doi:10.1111/j.1572-0241.2005.40859.x.
- [43] Mendoza T, Mayne T, Rublee D, Cleeland C. Reliability and validity of a modified Brief Pain Inventory short form in patients with osteoarthritis. *Eur J Pain* 2006;10:353–61. doi:10.1016/j.ejpain.2005.06.002.

## Tables

Table 1. Schedule of Events.

|  |                                                                           | On<br>inclusion | Yearly | Every second<br>year |
|--|---------------------------------------------------------------------------|-----------------|--------|----------------------|
|  | Informed consent and assessment of eligibility criteria                   | X               |        |                      |
|  | Review of medical history including medication                            | X               | X      |                      |
|  | Physical examination                                                      |                 |        |                      |
|  | Anthropometrics                                                           | X               | X      |                      |
|  | Vital Signs                                                               | X               | X      |                      |
|  | Clinical Lab and Biobank                                                  | X               | X      |                      |
|  | F-elastase-1 and HbA <sub>1</sub> C                                       | X               | X      |                      |
|  | Advanced MRI                                                              | X               |        | X                    |
|  | Contrast enhanced EUS and elastography                                    | X               |        | X                    |
|  | Quantitative Sensory Testing                                              | X               | X      |                      |
|  | Questionnaires                                                            | X               | X      |                      |
|  | Body composition: Bioelectrical impedance                                 | X               | X      |                      |
|  | Muscle strength and function: Hand grip strength and timed up and go test | X               | X      |                      |



1  
2  
3  
4  
5  
6  
7  
8  
9  
10  
11  
12  
13  
14  
15  
16  
17  
18  
19  
20  
21  
22  
23  
24  
25  
26  
27  
28  
29  
30  
31  
32  
33  
34  
35  
36  
37  
38  
39  
40  
41  
42  
43  
44  
45  
46  
47  
48  
49  
50  
51  
52  
53  
54  
55  
56  
57  
58  
59  
60

Table 2. Imaging assessment parameters.

| Method | Modality          | Measurement variables                                                                    |
|--------|-------------------|------------------------------------------------------------------------------------------|
| MRI    | T1, T2, MRCP      | Cambridge classification with modification for MRCP [38]                                 |
|        |                   | Main pancreatic duct diameter                                                            |
|        |                   | Pancreatic dimensions and volume                                                         |
|        | DWI               | Apparent diffusion coefficient (ADC)                                                     |
|        | DIXON             | Fat signal fraction (FSF)                                                                |
| EUS    | EUS B-mode        | Rosemont score [12]                                                                      |
|        | Contrast enhanced | 90 sec film recorded from stomach of pancreatic body will be recorded for later analysis |
|        | Elastography      | Histogram analysis and measurement of strain ratio [39]                                  |

Table 3. Circulating biomarker assessment parameters.

|                         | <b>Measurement variable</b>                                                                                                                 |
|-------------------------|---------------------------------------------------------------------------------------------------------------------------------------------|
| <b>Inflammation</b>     | Interleukin(IL)-4, IL-6, IL-8, IL-10, IL-12, IL-18, TNF-alpha<br>Transforming growth factor beta-1 (TGF-β1), Soluble fractalkine (s-Fr),    |
| <b>Fibrosis</b>         | Monocyte chemoattractant protein 1 (MCP-1), Matrix metalloproteinases (MMPs)                                                                |
| <b>Oxidative stress</b> | Glutathione peroxidase, Vitamin C, Ferric reducing ability of plasma, Malondialdehyde, 4-hydroxynonenal, superoxide dismutase, nitric oxide |

1  
2  
3  
4  
5  
6  
7  
8  
9  
10  
11  
12  
13  
14  
15  
16  
17  
18  
19  
20  
21  
22  
23  
24  
25  
26  
27  
28  
29  
30  
31  
32  
33  
34  
35  
36  
37  
38  
39  
40  
41  
42  
43  
44  
45  
46  
47  
48  
49  
50  
51  
52  
53  
54  
55  
56  
57  
58  
59  
60

Table 4. Nutritional and QST assessment parameters

|                                      | <b>Method</b>                             | <b>Measurement variable</b>                                                                                 |
|--------------------------------------|-------------------------------------------|-------------------------------------------------------------------------------------------------------------|
| <b>Nutritional assessment</b>        | Muscle strength: Hand held dynamometer    | Muscle strength (kg)                                                                                        |
|                                      | Muscle function: Timed up and go test     | Seconds                                                                                                     |
|                                      | Body composition: Bioelectrical impedance | Various bioelectrical impedance parameters                                                                  |
| <b>Assessment of pain processing</b> | Pressure algometry                        | Pressure pain and tolerance thresholds (kPa)                                                                |
|                                      | Temporal summation                        | Absolute and relative change in pain scores (NRS) to single and repetitive pinprick stimulations            |
|                                      | Conditioned pain modulation               | Absolute and relative change in pressure pain tolerance thresholds (kPa) before and after cold pressor test |

1  
2  
3  
4  
5  
6  
7  
8  
9  
10  
11 **Figure legend**

12  
13 Figure 1. A large proportion of patients develop CP after an episode of acute pancreatitis.

14 The development of CP is associated with continued or recurrent inflammation and  
15 progressive development of fibrosis.  
16  
17  
18  
19  
20  
21  
22  
23  
24  
25  
26  
27  
28  
29  
30  
31  
32  
33  
34  
35  
36  
37  
38  
39  
40  
41  
42  
43  
44  
45  
46  
47  
48  
49  
50  
51  
52  
53  
54  
55  
56  
57  
58  
59  
60

1  
2  
3  
4  
5  
6  
7  
8  
9  
10  
11  
12  
13  
14  
15  
16  
17  
18  
19  
20  
21  
22  
23  
24  
25  
26  
27  
28  
29  
30  
31  
32  
33  
34  
35  
36  
37  
38  
39  
40  
41  
42  
43  
44  
45  
46  
47  
48  
49  
50  
51  
52  
53  
54  
55  
56  
57  
58  
59  
60

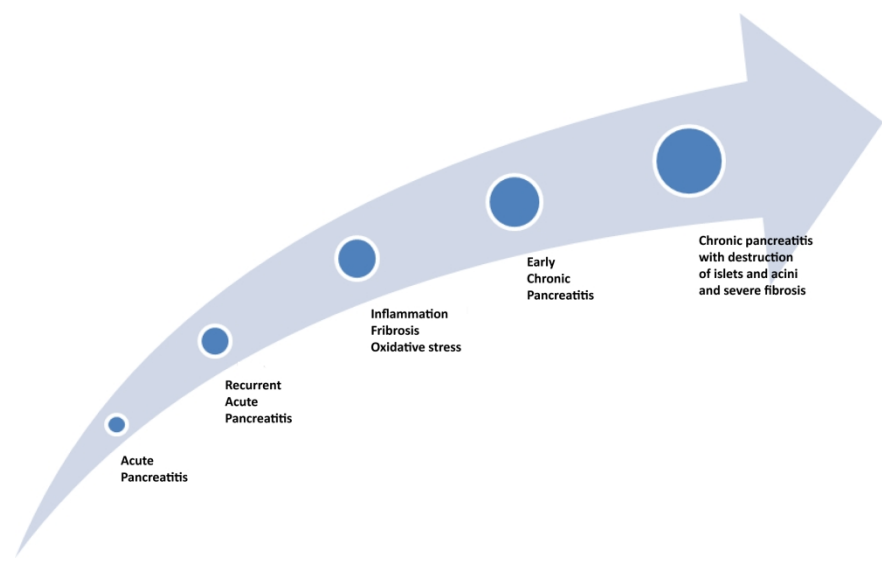

Figure

# BMJ Open

## Characterization of the fibro-inflammatory process involved in progression from acute to chronic pancreatitis: study protocol for a multicentre, prospective cohort study

|                                 |                                                                                                                                                                                                                                                                                                                                                                                                                                                                                                                                                                                                                                                                                                                                                                                                                                                                                                                                                                                                                                                                                                                                                                                                                                                                                                                            |
|---------------------------------|----------------------------------------------------------------------------------------------------------------------------------------------------------------------------------------------------------------------------------------------------------------------------------------------------------------------------------------------------------------------------------------------------------------------------------------------------------------------------------------------------------------------------------------------------------------------------------------------------------------------------------------------------------------------------------------------------------------------------------------------------------------------------------------------------------------------------------------------------------------------------------------------------------------------------------------------------------------------------------------------------------------------------------------------------------------------------------------------------------------------------------------------------------------------------------------------------------------------------------------------------------------------------------------------------------------------------|
| Journal:                        | <i>BMJ Open</i>                                                                                                                                                                                                                                                                                                                                                                                                                                                                                                                                                                                                                                                                                                                                                                                                                                                                                                                                                                                                                                                                                                                                                                                                                                                                                                            |
| Manuscript ID                   | bmjopen-2019-028999.R1                                                                                                                                                                                                                                                                                                                                                                                                                                                                                                                                                                                                                                                                                                                                                                                                                                                                                                                                                                                                                                                                                                                                                                                                                                                                                                     |
| Article Type:                   | Protocol                                                                                                                                                                                                                                                                                                                                                                                                                                                                                                                                                                                                                                                                                                                                                                                                                                                                                                                                                                                                                                                                                                                                                                                                                                                                                                                   |
| Date Submitted by the Author:   | 11-Jun-2019                                                                                                                                                                                                                                                                                                                                                                                                                                                                                                                                                                                                                                                                                                                                                                                                                                                                                                                                                                                                                                                                                                                                                                                                                                                                                                                |
| Complete List of Authors:       | Novovic, Srdan; Hvidovre Hospital, Department of Gastroenterology and Gastrointestinal Surgery<br>Borch, Anders; Bispebjerg Hospital, Abdominal Center K<br>Werge, Mikkel; Hvidovre Hospital, Department of Gastroenterology and Gastrointestinal Surgery<br>Karran, David; Bispebjerg Hospital, Abdominal Center K<br>Gluud, Lise; University of Copenhagen, Gastrounit Hvidovre Hospital<br>Schmidt, Palle; Hvidovre Hospital, Department of Gastroenterology and Gastrointestinal Surgery<br>Hansen, Erik; Hvidovre Hospital, Department of Gastroenterology and Gastrointestinal Surgery<br>Nøjgaard, Camilla; Hvidovre Hospital, Department of Gastroenterology and Gastrointestinal Surgery<br>Jensen, Annette; Hvidovre Hospital, Department of Radiology<br>Jensen, Frank; Hvidovre Hospital, Department of Radiology<br>Frøkjær, Jens Brøndum; Mech-Sense, Department of Radiology, Aalborg University Hospital,<br>Hansen, Mark; Bispebjerg Hospital, Abdominal Center K<br>Jørgensen, Lars; Bispebjerg Hospital, Abdominal Center K<br>Drewes, Asbjørn; Mech-Sense, Department of Gastroenterology and Hepatology, Aalborg University Hospital, ; Department of Clinical Medicine, Aalborg University,<br>Olesen, Søren; Aalborg University Hospital, Mech-Sense, Department of Gastroenterology and Hepatology |
| <b>Primary Subject Heading</b>: | Gastroenterology and hepatology                                                                                                                                                                                                                                                                                                                                                                                                                                                                                                                                                                                                                                                                                                                                                                                                                                                                                                                                                                                                                                                                                                                                                                                                                                                                                            |
| Secondary Subject Heading:      | Gastroenterology and hepatology                                                                                                                                                                                                                                                                                                                                                                                                                                                                                                                                                                                                                                                                                                                                                                                                                                                                                                                                                                                                                                                                                                                                                                                                                                                                                            |
| Keywords:                       | chronic pancreatitis, inflammation, fibrosis, oxidative stress, pain processing                                                                                                                                                                                                                                                                                                                                                                                                                                                                                                                                                                                                                                                                                                                                                                                                                                                                                                                                                                                                                                                                                                                                                                                                                                            |
|                                 |                                                                                                                                                                                                                                                                                                                                                                                                                                                                                                                                                                                                                                                                                                                                                                                                                                                                                                                                                                                                                                                                                                                                                                                                                                                                                                                            |

SCHOLARONE™  
Manuscripts

1  
2  
3  
4  
5  
6  
7  
8  
9  
10  
11  
12  
13  
14  
15  
16  
17  
18  
19  
20  
21  
22  
23  
24  
25  
26  
27  
28  
29  
30  
31  
32  
33  
34  
35  
36  
37  
38  
39  
40  
41  
42  
43  
44  
45  
46  
47  
48  
49  
50  
51  
52  
53  
54  
55  
56  
57  
58  
59  
60

1  
2  
3  
4  
5  
6  
7  
8  
9  
10  
11  
12  
13  
14  
15  
16  
17  
18  
19  
20  
21  
22

# Characterization of the fibro-inflammatory process involved in progression from acute to chronic pancreatitis: study protocol for a multicentre, prospective cohort study

15 Srdan Novovic<sup>1</sup>, Anders Borch<sup>2</sup>, Mikkel Werge<sup>1</sup>, David Karran<sup>2</sup>, Lise Lotte Gluud<sup>1</sup>, Palle Nordblad Schmidt<sup>1</sup>, Erik Feldager Hansen<sup>1</sup>, Camilla Nøjgaard<sup>1</sup>, Annette Bøjer Jensen<sup>3</sup>, Frank Krieger Jensen<sup>3</sup>, Jens Brøndum Frøkjær<sup>4</sup>, Mark Berner Hansen<sup>2</sup>, Lars Nannestad Jørgensen<sup>2</sup>, Asbjørn Mohr Drewes<sup>5</sup>, Søren Schou Olesen<sup>5</sup>

23 <sup>1</sup>Department of Gastroenterology and Gastrointestinal Surgery, Hvidovre University Hospital; <sup>2</sup>Abdominal center, Bispebjerg University Hospital; <sup>3</sup>Department of Radiology, Hvidovre University Hospital; <sup>4</sup>Department of Radiology, Aalborg University Hospital; <sup>5</sup>Mech-Sense & Centre for Pancreatic Diseases, Department of Gastroenterology & Hepatology, Clinical Institute, Aalborg University Hospital

33 **Short title: Fibrosis and Inflammation in Pancreatitis (FIP)**

35  
36  
37  
38  
39 **Keywords:** chronic pancreatitis, inflammation, fibrosis, oxidative stress, pain processing.

41  
42  
43 **Correspondence**

44 Srdan Novovic  
45 Department of Gastroenterology and Gastrointestinal Surgery  
46 Hvidovre hospital  
47 Kettegaard Alle 30  
48 2650 Hvidovre  
49 Tlf: +4538621350; e-mail: [srdan.novovic@regionh.dk](mailto:srdan.novovic@regionh.dk)

51  
52  
53 **Word count:** 4098.



## Abstract

**Introduction:** Chronic pancreatitis (CP) is thought to present the end-stage of a continuous disease process evolving from acute pancreatitis (AP), over recurrent acute pancreatitis (RAP), to early and end-stage CP. Due to the irreversible nature of CP, early detection and prevention is key. Prospective assessment based on advanced imaging modalities as well as biochemical markers of inflammation, fibrosis and oxidative stress may provide a better understanding of the underlying pathological processes and help identify novel biomarkers of disease with the ultimate goal of early diagnosis, intervention and prevention of disease progression. This paper describes the protocol of a prospective multicentre cohort study investigating the fibro-inflammatory process involved in progression from acute to chronic pancreatitis using state-of-the-art diagnostic imaging modalities and circulating biomarkers of inflammation, fibrosis and oxidative stress.

**Methods and analysis:** Adult control subjects and patients at different stages of CP according to the M-ANNHEIM system will be recruited from outpatient clinics at the participating sites and form three cohorts: controls (n=40), suspected CP (n=60) and definitive CP (n=60). Included patients will be followed prospectively for 15 years with advanced MRI and contrast enhanced EUS with elastography, assessment of endocrine and exocrine pancreatic function, biochemical and nutritional assessment, and evaluation of pain processing using quantitative sensory testing. Blood samples for a biobank will be obtained. The purpose of the biobank is to allow analyses of potential circulating biomarkers of disease progression including markers of inflammation, fibrosis and oxidative stress.

**Ethics and dissemination:** Permissions from the Regional Science Ethics committee and the Regional Data Protection Agency have been obtained. We will submit the results of the study for publication in peer-reviewed journals regardless of whether the results are positive, negative or inconclusive.

## Article Summary

### Strengths and limitations of this study

- The prospective and repetitive assessment of imaging, functional and biochemical parameters in the present study may provide clinical useful biomarkers for the identification of patients at increased risk of developing chronic pancreatitis.
- The relatively homogenous population, both genetically, socially and economically provide us with a unique and unbiased framework for studying the natural course of pancreatitis.
- A limitation of the study is that “state-of-the art” imaging, functional, endoscopic and biochemical assessment parameters may change during the study period, thus making comparisons over time difficult and potentially based on outdated technology.

1  
2  
3  
4  
5  
6  
7  
8  
9  
10  
11  
12  
13  
14  
15  
16  
17  
18  
19  
20  
21  
22  
23  
24  
25  
26  
27  
28  
29  
30  
31  
32  
33  
34  
35  
36  
37  
38  
39  
40  
41  
42  
43  
44  
45  
46  
47  
48  
49  
50  
51  
52  
53  
54  
55  
56  
57  
58  
59  
60

## Introduction

Chronic pancreatitis (CP) is a progressive fibro-inflammatory disease associated with persistent pathologic response to parenchymal injury or stress [1]. Over time, the fibro-inflammatory process can lead to irreversible fibrosis with morphological changes and loss of pancreatic function. Due to the irreversible nature of end-stage pancreatitis, early detection and prevention is key.

The global pooled incidence of CP is 10 per 100,000 general population per year [2] and prevalence rates are reported to be between 40-50 per 100,000 persons [3]. However, cumulating evidence suggests that the incidence of CP is rising [4,5] and a Danish nationwide population-based cohort study showed a five-fold increased mortality rate with a life expectancy that was approximately 8 years less among CP patients compared with population controls [6]. Taken together, this illustrates the great impact CP has on health, economic, and social aspects.

Alcohol and smoking are the major aetiological risk factors of CP [7], and there seems to be an additive effect of alcohol and smoking. Other causes include hypercalcemia, hyperlipidaemia, obstruction of the biliary or pancreatic duct, autoimmune conditions, and hereditary conditions. About 20% of cases are idiopathic, but this number is likely to decrease as the understanding of the pathophysiology underlying CP evolves.

Currently the diagnosis of CP is based on a combination of symptoms, biochemical tests, and imaging parameters. Abdominal pain is the cardinal symptom of CP and present in the majority of patients during their disease course, but the intensity and temporal pattern varies substantially. At later disease stages patients may develop diabetes, steatorrhea and weight loss, but the disease course is unpredictable in the majority of patients, thus making symptom-based assessment unreliable. The biochemical tests used for assessment of CP include glycated haemoglobin [HbA<sub>1c</sub>] (endocrine pancreatic function) and faecal elastase [FE], breath test or direct pancreatic function tests (exocrine pancreatic function tests). Diagnostic imaging is used for characterisation of typical morphological changes including parenchymal lobulation, calcifications, parenchymal atrophy, pseudocysts and pancreatic duct abnormalities. Various imaging modalities are used for assessment including computed tomography (CT), magnetic resonance imaging (MRI) and endoscopic ultrasound (EUS)[8].

1  
2  
3  
4 Some patients are diagnosed with CP without preceding attacks of acute pancreatitis (AP).  
5  
6 These patients typically present with symptoms of end stage disease including steatorrhea,  
7  
8 diabetes and chronic abdominal pain. However, a large proportion of patients diagnosed  
9  
10 with CP have a history of AP or recurrent acute pancreatitis (RAP) (Fig. 1). In keeping with  
11  
12 this, a metanalysis found that 10% percent of patients with a first episode of AP and 36% of  
13  
14 patients with RAP develop CP, with a higher risk of disease progression among smokers,  
15  
16 alcoholics, and men [2] [3] [9]. These findings attest to the understanding of CP as a  
17  
18 continuous disease process evolving from AP, over RAP, to early and end-stage CP as also  
19  
20 outlined in a recent international consensus draft on a mechanistic definition of CP [1].  
21  
22 Importantly, this understanding provides a theoretical framework for studying the fibro-  
23  
24 inflammatory processes involved in the development of CP by prospectively assessing  
25  
26 patients admitted with AP and RAP during their course of disease towards early and end-  
27  
28 stage CP. Hence, prospective assessment based on state-of-the-art imaging modalities as  
29  
30 well as biochemical markers of inflammation, fibrosis and oxidative stress may provide a  
31  
32 better understanding of the underlying pathological processes and help identifying novel  
33  
34 biomarkers of disease with the ultimate goal of early diagnosis, intervention and prevention  
35  
36 of progression. Along these lines, a holistic framework for prevention of pancreatitis has  
37  
38 recently been introduced and outlined preventive measures at both primary, secondary and  
39  
40 tertiary levels based on current knowledge on the natural course of disease progression [3].

## 41 **Current standards and challenges in assessment of pancreatitis**

### 42 **Imaging**

43  
44 Various imaging techniques can be used to characterize pancreatic morphology. CT is in  
45  
46 most cases used for the initial work-up and is particularly useful for detection of advanced  
47  
48 disease characteristics of CP including parenchymal and intraductal calcifications, gross  
49  
50 duct pathology and parenchymal atrophy [10]. Furthermore, CT is key in ruling out relevant  
51  
52 differential diagnosis including pancreatic cancer. Despite CT being the imaging modality of  
53  
54 choice for initial investigation, it cannot exclude a diagnosis of CP, nor can it be used to  
55  
56 exclusively diagnose 'early CP'.  
57  
58  
59  
60

1  
2  
3  
4  
5  
6  
7  
8  
9  
10  
11  
12  
13  
14  
15  
16  
17  
18  
19  
20  
21  
22  
23  
24  
25  
26  
27  
28  
29  
30  
31  
32  
33  
34  
35  
36  
37  
38  
39  
40  
41  
42  
43  
44  
45  
46  
47  
48  
49  
50  
51  
52  
53  
54  
55  
56  
57  
58  
59  
60

MRI based techniques including magnetic resonance cholangiopancreatography (MRCP) are more accurate for detection of pancreatic duct abnormalities (dilatations and strictures) and subtle changes of the pancreatic parenchyma and side branches, which can be attributed to early signs of CP [11]. The MR based techniques can be further refined by assessment of pancreatic gland volume and administration of secretin whereby a combined quantitative morphological and functional assessment of the pancreatic gland can be obtained. This includes characterization of subtle ductal abnormalities and pancreatic secretion. In addition, diffusion weighted imaging (DWI) can provide a proxy of fibrotic changes and emerging methods like the DIXON technique can be used to assess fat signal fraction (FSF) for evaluation of fatty infiltration of the pancreatic parenchyma.

The gold standard for establishing a diagnosis of early CP imaging is currently endoscopic ultrasound (EUS). Diagnostic criteria related to the parenchyma and the pancreatic duct have been established, and in 2009 a weighted scoring system was proposed by a panel of experts, the Rosemont score [12]. Emerging endoscopic methods with assessment of pancreatic blood flow and tissue stiffness by elastography may further improve the diagnostic utility of EUS [13].

Taken together, a multimodal approach combining advanced MRI and EUS techniques will likely provide novel and complementary information on pancreatic morphology and function that may reflect unique aspects of the pathology underlying progressive pancreatitis disorders (AP → RAP → CP) that have not previously been identified using conventional imaging modalities.

### **Circulating biomarkers of inflammation, fibrosis and oxidative stress**

Most of our knowledge about physiological and pathophysiological mechanisms in healthy and diseased pancreas comes from experimental studies. Due to the anatomy, complexity and risk associated with direct sampling from pancreatic tissue, most of our information on human pancreas arises from circulating marker of pancreatic physiology or injury.

**Inflammation:** The inflammatory profile characterising early stages of pancreatitis may reflect the trajectory of disease and subsequent development of fibrosis. Hence, patients with CP have increased serum levels of interleukin (IL)-6, IL-4, IL-18 [14][15][16], which are

1  
2  
3  
4 implicated in the wound healing response and the progression of fibrotic disease. Also,  
5  
6 tumour necrosis factor (TNF)- $\alpha$  may be implicated in disease progression [17].  
7

8 **Fibrosis:** Patients with CP have elevated plasma levels of fibro genesis markers such as  
9  
10 transforming growth factor beta-1 (TGF- $\beta$ 1), soluble fractalkine (s-FR) and monocyte  
11  
12 chemoattractant protein 1 (MCP-1) [18][19][20]. Decreasing MCP-1 and TGF- $\beta$ 1 levels with  
13  
14 anti-inflammatory drugs was shown to reduce the severity of CP in a caerulein-induced CP  
15  
16 mouse model [21]. Matrix metalloproteinases (MMPs) are a group of enzymes involved in  
17  
18 the degradation of collagen, proteoglycans, elastin and fibronectin, all of which play an  
19  
20 important role in the remodelling of the extracellular matrix. The role of MMPs in the  
21  
22 development of progressive fibrosis and cirrhosis is well established [22] and emerging  
23  
24 evidence suggests that MMPs may have a similar role in CP [23]. Elevated serum MMP-  
25  
26 9 levels have been found in patients with both AP and CP, and active form of MMP-9 could  
27  
28 be involved in the development of diabetes mellitus associated with CP [24].

29 **Oxidative stress** is a result of imbalance between reactive oxygen species and their  
30  
31 neutralizing mechanisms, which may result in cell or tissue damage. Increased oxidative  
32  
33 stress with the resulting formation of free radicals has been implicated in the  
34  
35 pathophysiology of CP [25] and treatment with antioxidants has been shown to reduce  
36  
37 disease and pain severity in randomized controlled trials [26,27], although the effects may  
38  
39 be related to the underlying aetiology [28,29]. Recent studies have shown that oxidative  
40  
41 stress may also be implicated in RAP [30]. Free radicals do not only exert local effect in  
42  
43 pancreas but are also released in systemic circulation and can thus be quantified.

#### 44 **Pain processing and quantitative sensory testing**

45 The processing of pain in central pain pathways undergoes changes in a large proportion of  
46  
47 patients with painful CP. These include sensitization of central pain pathways, impaired  
48  
49 capacity of pain modulation as well as structural and functional changes in the brain [31].  
50  
51 Although the presence of these changes is well documented in numerous cross-sectional  
52  
53 studies, the temporal aspects of changes in pain processing during disease progression  
54  
55 have not previously been investigated in the context of pancreatitis. Quantitative sensory  
56  
57 testing (QST) can be used to map the pain system; the technique is based on the rationale  
58  
59 that different neural pathways and networks can be explored using standardized stimulation  
60

1  
2  
3  
4 with simultaneous recording of the evoked pain response by psychophysical and/or  
5 objective methods [32]. Due to spinal convergence between visceral afferents from the  
6 pancreas and somatic afferents from upper abdominal skin dermatomes, somatic QST can  
7 be used to assess if the pain system is sensitized by nociceptive input from the pancreas  
8 [33]. Together with specific test paradigms (temporal summation and assessment of pain  
9 modulation) QST can be used to characterize the state of the pain system and to document  
10 if patients have abnormal central pain processing.  
11  
12  
13  
14  
15

## 16 **Nutrition**

17  
18  
19 The risk factors associated with underweight and malnutrition in patients with CP are  
20 complex and likely multifactorial with the most frequently reported being pancreatic exocrine  
21 insufficiency. However, many patients lose weight early in their disease course and before  
22 evolution of pancreatic exocrine insufficiency. For example, postprandial pain, which is seen  
23 in many patients, may also limit food intake and lead to underweight and malnutrition. There  
24 is a paucity of data on this important topic, and continuous characterization of nutritional  
25 status in patients going through phases of AP, to RAP to CP may provide us with essential  
26 knowledge on metabolic processes related to inflammation and fibrosis. A combined use of  
27 bioelectrical impedance, hand-grip strength (HGS), timed up and go test (TUG), assessment  
28 of endocrine- (Hb1AC) and exocrine insufficiency (FE), and biochemical tests enables  
29 qualitative and quantitative assessment of nutritional status.  
30  
31  
32  
33  
34  
35  
36  
37

## 38 **Hypotheses**

39  
40  
41 Current knowledge on the progression of CP is mostly based on cross-sectional studies  
42 including patients with different stages of RAP and CP. By prospectively following well  
43 characterised cohorts of patients with pancreatitis at different stages (AP → RAP → CP)  
44 with serial imaging (advanced MRI and EUS), profiling of fibro-inflammatory pathways using  
45 circulating biomarkers and assessment of nutritional status and pain processing using QST,  
46 this study will help elucidate the underlying pathophysiology of pancreatitis.  
47  
48  
49  
50

51 The hypotheses of this study are:

- 52 • Prospective assessment of patients progressing from AP to CP, using advanced  
53 imaging techniques and circulating biomarkers of inflammation, fibrosis and oxidative  
54 stress, can provide new mechanistic insight to the underlying fibro-inflammatory  
55  
56  
57  
58

1  
2  
3  
4 process. This knowledge may be used to design future clinical studies focusing on  
5 prevention of inflammation and fibrosis in the pancreas and other organ systems.  
6

- 7
- 8 • Changes in pain processing over time are poorly understood in patients progressing  
9 from AP to CP. This information may be used to identify patients at risk for developing  
10 a chronic pain syndrome with irreversible neuroplastic changes in the central nervous  
11 system.  
12
  - 13 • Changes in nutritional state over time are poorly understood in patients progressing  
14 from AP to CP. This information may be used to identify patients at risk for developing  
15 malnutrition.  
16  
17  
18  
19

## 20 21 **Aims**

22  
23 **Primary aim:** To prospectively investigate the fibro-inflammatory process involved in  
24 progression from acute to chronic pancreatitis using state-of-the-art diagnostic imaging  
25 modalities (contrast enhanced EUS, EUS guided elastography and advanced MRI) and  
26 circulating biomarkers of inflammation, fibrosis and oxidative stress.  
27  
28

29  
30 **Secondary aim:** To prospectively characterize pain processing and nutritional status in  
31 patients progressing from acute to chronic pancreatitis.  
32  
33

## 34 35 **Methods**

### 36 37 **Study design**

38  
39 Prospective cohort study including adult patients with RAP, probable or definitive CP  
40 recruited from outpatient clinics at the three participating sites (Hvidovre, Bispebjerg, and  
41 Aalborg University Hospitals). The study is approved by the Danish Data Protection Agency  
42 (VD-2018-298; I-suite no.: 6542) and the Regional Committee on Health Research Ethics  
43 (Journal-no.: H-18017705). All study participants will provide written informed consent and  
44 the study will be conducted according to the Declaration of Helsinki. The study is non-  
45 interventional; all participants will be treated and monitored according to the current best  
46 clinical evidence-based practice. The patient inclusion began in February 2019. We  
47 anticipate to complete the inclusion of all cohorts during a two years period. We will follow  
48 the patient cohorts for 15 years, and the anticipated completion date is February 1<sup>st</sup>, 2035.  
49  
50  
51  
52  
53  
54  
55  
56  
57  
58  
59  
60



1  
2  
3  
4  
5  
6  
7  
8  
9  
10  
11  
12  
13  
14  
15  
16  
17  
18  
19  
20  
21  
22  
23  
24  
25  
26  
27  
28  
29  
30  
31  
32  
33  
34  
35  
36  
37  
38  
39  
40  
41  
42  
43  
44  
45  
46  
47  
48  
49  
50  
51  
52  
53  
54  
55  
56  
57  
58  
59  
60

## Inclusion criteria

- Age 18-75 years
- **Cohort 1 (definitive CP):** Patients with definitive CP (N=60) of any aetiology except gallstone induced CP. The M-ANNHEIM diagnostic criteria will be used for the definition of definitive CP. Hence, patients will be included in this cohort if they fulfil one or more of the following criteria: pancreatic calcifications, moderate or marked pancreatic duct changes (Cambridge III or IV) or typical histology of CP [34].
- **Cohort 2 (suspected CP):** Patients with RAP except gallstone induced RAP and patients with probable CP according to the M-ANNHEIM criteria (N=60). RAP is defined as two or more cases of AP as diagnosed by the revised Atlanta Criteria [35]. Probable CP is defined as patients with a typical history of CP (persistent abdominal pain and/or a history of a single AP episode) in combination with any of the following: mild pancreatic duct changes (Cambridge I or II), recurrent or persistent pseudocysts, abnormal exocrine pancreatic function test or post pancreatitis diabetes mellitus (elevated glycated haemoglobin >3 months after diagnosis of pancreatitis) [3] [34].
- **Cohort 3 (control subjects):** Subjects without any previous history of pancreatic or gastrointestinal diseases will be included in the control cohort (n=40).

## Exclusion criteria

Patients with the following conditions will be excluded from participation in the study:

- a. Pregnant or lactating patients
- b. Patients in whom MRI is contra-indicated (metallic implants, pacemaker, implantable cardioverter defibrillator, claustrophobia)
- c. Patients with chronic liver disease, chronic renal failure, malignancy, chronic inflammatory bowel syndrome, chronic obstructive lung disease, pulmonary fibrosis. If the patient develops any of the listed diseases during the study period they will continue their participation in the study.
- d. Patients treated with anti-inflammatory drugs of any kind at the time of inclusion: local or systemic corticosteroids, NSAID's, salazopyrins or other. However, once included, they will continue their participation even though they receive treatment with anti-inflammatory drugs.

## Sample size, time schedule and follow up

The present study is observational. No previous long-term prospective studies have evaluated the fibro-inflammatory process associated with the development of CP and we were therefore unable to undertake a valid sample size calculation. Consequently, the sample size was set to 60 participants in the patient cohorts, assuming that 36% of participants in cohort 2 will progress to definitive CP [3][36][37]. Similar sample size estimates apply for a recently published study protocol from the Consortium for the Study of Chronic Pancreatitis, Diabetes and Pancreatic Cancer (CPDPC) that is also based on MRI assessment parameters [38]. We expected that we will be able to reach our sample size during an inclusion period of two years, based on experience from previous cohort studies from our departments. We anticipate that all three centres will include approximately equal numbers of participants.

Included patients will be followed up prospectively for 15 years. An interim analysis, assessing both clinical, functional, imaging and biochemical parameters will be performed after 4 years [39]. Patient cohorts will follow the same time schedule and plan for follow up as outlined in Table 1.

Included patients will be evaluated during a quiescent phase of disease; consequently, an acute attack of pancreatitis or exacerbation in CP requiring hospital admission will lead to a quarantine period of 4 weeks before evaluation by the protocol can be performed. Resolution of pancreatitis will be documented by assessment of plasma amylase and CRP.

On inclusion, review of medical history including medication, physical examination will be performed. The following patient characteristics will be recorded: age at inclusion; gender; date the patient was diagnosed with AP/RAP/CP; aetiology of pancreatitis; previous and current patterns of tobacco and alcohol consumption; presence of diabetes mellitus and other comorbidities; medications. Advanced MRI and contrast enhanced EUS with elastography will be used to characterize pancreatic morphology [40][41] (Table 2). Endocrine and exocrine pancreatic function will be characterized by Hb1AC and faecal elastase and routine biochemical tests including white blood count, haemoglobin, platelets, sodium, potassium, urea, creatinine, C-reactive protein, albumin, ALT, amylase, alkaline

1  
2  
3  
4 phosphatase, bilirubin, INR, calcium, phosphate, magnesium, cobalamin, vitamin-D, PTH  
5 will be obtained. In addition to routine biochemical tests, blood samples (see later) will be  
6 deposited in a biobank for future evaluation of biomarkers of inflammation, fibrosis, and  
7 oxidative stress (Table 3). Nutritional assessment and evaluation of pain processing by QST  
8 will be performed, and the measurement variables reported in Table 4 will be recorded.  
9  
10

11  
12  
13 On subsequent yearly visits review of medical history including medication, patterns of  
14 smoking and alcohol consumption during the past year and physical examination will be  
15 performed. Endocrine and exocrine pancreatic function will be reassessed together with the  
16 routine biochemical tests outlined above. Blood samples will be deposited in a biobank for  
17 future evaluation of circulating biomarkers and nutritional assessment and evaluation of pain  
18 processing by QST will be performed as described for the inclusion visit. In addition to the  
19 yearly assessments, patients will undergo advanced MRI and contrast enhanced EUS as  
20 described at the inclusion visit every second year.  
21  
22

23  
24 During the study period, patients will be counselled and treated according to best clinical  
25 practice, including advice on alcohol and smoking cessation.  
26  
27

### 28 29 30 31 **Biobank**

32  
33 Ninety ml of blood (processed as plasma, serum, buffy coat and cells) will be deposited in a  
34 biobank on the day of inclusion, and subsequently on a yearly basis for 15 years. The  
35 purpose of the biobank is to allow analyses of potential biomarkers for disease progression.  
36 The analyses will be conducted before January 1<sup>th</sup>, 2040 (the study termination date). Any  
37 remaining blood will be destroyed. The deposited blood material will also enable us to  
38 perform genetic studies if deemed relevant. The genetic analyses will only be performed  
39 following approval from the Regional Committee on Health Research Ethic.  
40  
41  
42  
43  
44  
45

### 46 47 **Patient and Public Involvement**

48  
49 Patients and public were not involved in the design and recruitment of the present study. As  
50 the study is designed as a part of a clinical setup and monitoring, the results of the study will  
51 be continuously discussed with the participating patients.  
52  
53  
54  
55

### 56 57 **Study procedures:**

## Magnetic resonance imaging

MRI is performed in collaboration with the radiological departments of the participating institutions. A common MRI protocol is used at all participating sites; the protocol has been described in detail previously [8,42].

## Endoscopic ultrasound

EUS is performed under conscious sedation with fasting (min 6 hours) patient lying on the left side, and under continuous monitoring of pulse, blood pressure and oxygenation. EUS B-mode is applied to calculate Rosemont score (performed before further examination). Ten seconds sequences from the body and head of the pancreas are recorded. From stomach, elastography is applied on pancreatic body: 10 seconds loop will be recorded with three images and a histogram. Contrast enhanced EUS is performed by a bolus administration of 2,4 ml SonoVue®. A film sequence of 90 seconds is recorded.

## Circulating biomarkers

Venous blood samples are drawn from an antecubital vein. Following this procedure, the blood is processed as plasma, serum, buffy coat and cells, and stored at -80° C until subsequent analysis (biobank).

## Quantitative sensory testing

*Pressure algometry:* The pressure pain detection threshold (pPDT) and pressure pain tolerance threshold (pPTT) are determined on six different sites, corresponding to the somatic dermatomes above the clavicle (C5), middle of the anterior axillary fold (T4), dorsum (T10(D)), spina iliaca anterior superior (L1), rectus femoris (L4), and the abdominal pancreatic area (T10(P)). Pressure algometry is performed using an electronic pressure algometer (Somedic AB, Stockholm, Sweden), with a surface area of 1 cm<sup>2</sup>. Pressure is increased at a rate of 30 kPa/sec until pPDT and pPTT is reached, and subjects are instructed to press a button at this point, which stops the stimulation, and the corresponding pressure (kPa) is recorded.

*Conditioned pain modulation (CPM):* To induce CPM, a cold pressor test is applied as the conditioning stimulus and pressure stimulations are used as test stimuli. Pressure

1  
2  
3  
4 stimulation is applied at the on the non-dominant rectus femoris until subjects reach the PTT  
5 using the equipment and procedure described above. The cold pressor test is performed by  
6 asking the subject to immerse their dominant hand in cooled water (2 °C) for 2 minutes, or  
7 less if the evoked pain is considered to be intolerable. The CPM effect is assessed as the  
8 absolute and relative change in PTT before and after the cold pressor test.  
9  
10  
11  
12

13 *Temporal summation:* In this test, the perceived intensity of a single pinprick stimulus of 256  
14 mN, is tested over the epigastric area (T10) and the dominant forearm and compared with  
15 that of a series of 10 repetitive pinprick stimuli of the same physical intensity (1/s applied  
16 within an area of 1 cm<sup>2</sup>). The subject is asked to give a pain rating representing the single  
17 stimulus, and the estimated mean over the whole series of 10 stimuli using a '0–10'  
18 numerical rating scale (NRS). The temporal summation ratio is calculated as the absolute  
19 and relative change in pain scores to single and repetitive pinprick stimulations. Pin pricks  
20 are applied using a modified von Frey hairs (Optihair2-Set, Marstock Nervtest, Germany).  
21  
22  
23  
24  
25  
26  
27

## 28 **Nutritional assessment**

29  
30 *Body composition:* Bioelectrical impedance analysis enables a fast and accurate  
31 measurement of body compartments. For the purpose of this study, bioelectrical impedance  
32 will be assessed by the seca medical Body Composition Analyzer 514/515 (seca gmbh &  
33 co. kg, Hamburg) or BioScan 920-II (Maltron, Essex, UK). The analyser consists of a  
34 platform with an integrated scale, a handrail system, and a display and operation unit. The  
35 device uses four pairs of electrodes that are positioned at each hand and foot, with one  
36 electrode in each pair through which the electrical current enters the limb and the other  
37 electrode detects the voltage drop. Analysis time is 20-30 seconds.  
38  
39  
40  
41  
42  
43

44 *Hand grip strength:* Muscle strength is determined by hand grip strength measured to the  
45 nearest kilogram using a hydraulic hand dynamometer (NC70142, North Coast Medical,  
46 Arcata, CA, USA or Jamar® Smart Hand Dynamometer, Patterson medical, Warrenville, IL,  
47 USA). The dynamometer is held in the second handle position and the patient is instructed  
48 to sit on a chair with the shoulder neutrally rotated, holding the elbow bend 90° and the wrist  
49 in neutral position. Hand grip strength is measured 3 times for each hand; assessments are  
50 separated by intervals of approximately 10 seconds. The highest value for each hand is  
51 recorded and the mean value is calculated.  
52  
53  
54  
55  
56  
57  
58

1  
2  
3  
4 *Timed up-and-go test:* Muscle function is characterized by the timed up-and-go test (TUG).  
5  
6 This test is performed and reported (seconds) as the time it takes a patient to get up from  
7  
8 sitting position on a chair, walk three meters, turn around, walk back to the chair, and sit  
9  
10 down.

## 11 **Questionnaires**

12  
13  
14 *Quality of life:* The EORCT QLQ-C30 questionnaire is used to document life quality, physical  
15  
16 function, and a number of other health-related parameters [43]. The questionnaire has been  
17  
18 validated specifically for assessment of patients with CP and is composed of single-item  
19  
20 measures and multi-item scales with scores ranging from 0 to 100 after linear transformation  
21  
22 of the raw score [44]. A high score for a functional scale represents a high level of  
23  
24 functioning, as does a high score for the global health status, while a high score for the  
25  
26 symptom items represents a high level of symptomatology.

27  
28 *Pain symptoms:* The brief pain inventory short form is used to document the patients pain  
29  
30 symptoms and its interference with daily activities (interference score) [45].

## 31 **Ethics and dissemination**

32  
33  
34 This study will be conducted according to the Danish national legislation on health.  
35  
36 Permissions from the Regional Science Ethics committee and the Regional Data Protection  
37  
38 Agency are obtained. The project will lead to better understanding of fibrogenic process that  
39  
40 leads to CP and better understanding of changes in pain perception and nutritional aspects  
41  
42 during the course of the disease. The combination of diagnostic imaging and biochemical  
43  
44 parameters will enable improved identification of those patients who are at particular risk of  
45  
46 developing early chronic pancreatitis. The improvement in identification is vital, as there are  
47  
48 emerging inhibitors of fibrosis, which potentially could impair the ongoing fibrogenesis of  
49  
50 pancreas. Hence, the project will lead to new strategies for patient management. Socio-  
51  
52 economically, the results of this study may lead to reduced costs for hospitalizations and  
53  
54 accidents related to CP. The techniques developed in the project period may also be used  
55  
56 to understand and evaluate the fibrogenic processes in other organs, primarily the liver.

57  
58 The investigations and examinations that are planned in present protocol are all a part of  
59  
60 existing routine work-up. The major change associated with the participation in the study is

1  
2  
3  
4 that the examinations are scheduled at regular time intervals. Blood for the purpose of  
5 biobank will be drawn simultaneously with the routine blood tests. Faecal elastase,  
6 bioelectrical impedance, hand-grip test, timed-up-and-go test, quantitative sensory testing  
7 and MRI are not associated with any risks. The endoscopic ultrasound can be associated  
8 with discomfort and in very rare cases with serious complications such as perforation of  
9 esophagus, stomach or duodenum.  
10  
11  
12  
13  
14

15 The study may contain several combinations of data that may be written as papers in peer  
16 reviewed international journals. We will publish the study results regardless of whether the  
17 results are positive, negative or inconclusive.  
18  
19  
20

## 21 **Discussion**

22  
23 Recently the US based Consortium for the Study of Chronic Pancreatitis, Diabetes and  
24 Pancreatic Cancer (CPDPC) has published their study protocol for the Prospective  
25 Evaluation of Chronic Pancreatitis for Epidemiologic and Translational Studies (PROCEED)  
26 [39]. Although the PROCEED study is mainly based on CT based imaging parameters, as  
27 opposed to the MRI based approach in our study, the design of the PROCEED study is in  
28 many ways comparable to ours. Hence, both studies focus on prospective assessment of  
29 disease progression parameters in well-defined cohorts of patients with CP at different  
30 disease stages using cross-sectional imaging and circulating biomarkers. The patient  
31 cohorts have been characterised using comparatively similar criteria, which will allow  
32 comparison across studies.  
33  
34  
35  
36  
37  
38  
39

40  
41 A unique characteristic of our study, compared to the PROCEED study, is the annual  
42 assessment of pain processing and modulation based on a QST protocol specifically  
43 designed for pancreatic pain. In addition, detailed nutritional assessment, using bioelectrical  
44 impedance and muscle function tests, distinct our protocol from that of the PROCEED study  
45 [39]. Finally, our study population comprises of a very homogenous population, both  
46 genetically, socially and economically, which provides us with an opportunity to study the  
47 natural course of CP with reduced bias from diverse patient characteristics.  
48  
49  
50  
51  
52  
53  
54

## 55 **Author contributions**

56  
57  
58  
59  
60

1  
2  
3  
4 All authors made substantial contributions to the design of the study. **SN, LLG** and **SSO**  
5 contributed to drafting the protocol and revising it critically for important intellectual content.  
6  
7 **ABJ, JBF** and **FKJ** contributed with important aspects on diagnostic imaging. **DK, PNS** and  
8  
9 **EFH** contributed with important aspects on endoscopic techniques. **MW, AB, CN, MBH,**  
10  
11 **LNJ** and **AMD** contributed critical revisions to the draft for important intellectual content. All  
12  
13 authors reviewed and approved the final version submitted for publication.  
14  
15

### 17 **Conflicts of interest**

18  
19 None to declare.  
20  
21  
22

### 24 **Funding**

25  
26 This research received no specific grant from any funding agency in the public, commercial  
27  
28 or not-for-profit sectors.  
29  
30  
31  
32  
33  
34  
35  
36  
37  
38  
39  
40  
41  
42  
43  
44  
45  
46  
47  
48  
49  
50  
51  
52  
53  
54  
55  
56  
57  
58  
59  
60



## References

- [1] Whitcomb DC, Frulloni L, Garg P, Greer JB, Schneider A, Yadav D, et al. Chronic pancreatitis: An international draft consensus proposal for a new mechanistic definition. *Pancreatology* 2016;16:218–24. doi:10.1016/j.pan.2016.02.001.
- [2] Xiao AY, Tan ML, Wu LM, Asrani VM, Windsor JA, Yadav D, Petrov MS. Global incidence and mortality of pancreatic diseases: a systematic review, meta-analysis, and meta-regression of population-based cohort studies. *Lancet Gastroenterol Hepatol.* 2016 Sep;1(1):45-55. doi:10.1016/S2468-1253(16)30004-8.
- [3] Petrov MS, Yadav D. Global epidemiology and holistic prevention of pancreatitis. *Nat Rev Gastroenterol Hepatol.* 2019 Mar;16(3):175-184. doi: 10.1038/s41575-018-0087-5.
- [4] Jupp J, Fine D, Johnson CD. The epidemiology and socioeconomic impact of chronic pancreatitis. *Best Pract Res Clin Gastroenterol* 2010;24:219–31. doi:10.1016/j.bpg.2010.03.005.
- [5] Nøjgaard C, Bendtsen F, Becker U, Andersen JR, Holst C, Matzen P. Danish patients with chronic pancreatitis have a four-fold higher mortality rate than the Danish population. *Clin Gastroenterol Hepatol* 2010;8:384–90. doi:10.1016/j.cgh.2009.12.016.
- [6] Bang UC, Benfield T, Hyldstrup L, Bendtsen F, Beck Jensen JE. Mortality, cancer, and comorbidities associated with chronic pancreatitis: A Danish nationwide matched-cohort study. *Gastroenterology* 2014;146:989–94. doi:10.1053/j.gastro.2013.12.033.
- [7] Etemad B, Whitcomb DC. Chronic pancreatitis: Diagnosis, classification, and new genetic developments. *Gastroenterology* 2001;120:682–707. doi:10.1053/gast.2001.22586.
- [8] Madzak A, Olesen SS, Wathle GK, Haldorsen IS, Drewes AM, Frøkjær JB. Secretin-Stimulated Magnetic Resonance Imaging Assessment of the Benign Pancreatic Disorders: Systematic Review and Proposal for a Standardized Protocol. *Pancreas* 2016;45:1092–103. doi:10.1097/MPA.0000000000000606.
- [9] Ahmed Ali U, Issa Y, Hagensars JC, Bakker OJ, van Goor H, Nieuwenhuijs VB, et al. Risk of Recurrent Pancreatitis and Progression to Chronic Pancreatitis After a

- 1  
2  
3  
4 First Episode of Acute Pancreatitis. *Clin Gastroenterol Hepatol* 2016;14:738–46.  
5 doi:10.1016/j.cgh.2015.12.040.  
6  
7  
8 [10] Löhr JM, Dominguez-Munoz E, Rosendahl J, Besselink M, Mayerle J, Lerch MM, et  
9 al. United European Gastroenterology evidence-based guidelines for the diagnosis  
10 and therapy of chronic pancreatitis (HaPanEU). *United Eur Gastroenterol J*  
11 2017;5:153–99. doi:10.1177/2050640616684695.  
12  
13 [11] Robinson PJA, Sheridan MB. Abdominal radiology Review article Pancreatitis :  
14 computed tomography and magnetic resonance imaging 2000;408:401–8.  
15  
16 [12] Catalano MF, Sahai A, Levy M, Romagnuolo J, Wiersema M, Brugge W, et al. EUS-  
17 based criteria for the diagnosis of chronic pancreatitis: the Rosemont classification.  
18 *Gastrointest Endosc* 2009;69:1251–61. doi:10.1016/j.gie.2008.07.043.  
19  
20 [13] Kawada N, Tanaka S. Elastography for the pancreas: Current status and future  
21 perspective. *World J Gastroenterol* 2016;22:3712–24. doi:10.3748/wjg.v22.i14.3712.  
22  
23 [14] Pedersen N, Larsen S, Seidelin JB, Nielsen OH. Alcohol modulates circulating levels  
24 of interleukin-6 and monocyte chemoattractant protein-1 in chronic pancreatitis.  
25 *Scand J Gastroenterol* 2004;39:277–82. doi:10.1080/00365520310008296.  
26  
27 [15] Sandström A, Andersson R, Segersvärd R, Löhr M, Borrebaeck CAK, Wingren C.  
28 Serum proteome profiling of pancreatitis using recombinant antibody microarrays  
29 reveals disease-associated biomarker signatures. *Proteomics - Clin Appl*  
30 2012;6:486–96. doi:10.1002/prca.201200051.  
31  
32 [16] Schneider A, Haas SL, Hildenbrand R, Siegmund S, Reinhard I, Nakovics H, et al.  
33 Enhanced expression of interleukin-18 in serum and pancreas of patients with  
34 chronic pancreatitis. *World J Gastroenterol* 2006;12:6507–14.  
35  
36 [17] Sri Manjari K, Jyothy A, Shravan Kumar P, Prabhakar B, Uma Devi M, Ramanna M,  
37 et al. A single-nucleotide polymorphism in tumor necrosis factor- $\alpha$  (-308 G/A) as a  
38 biomarker in chronic pancreatitis. *Gene* 2014;539:186–9.  
39 doi:10.1016/j.gene.2014.02.014.  
40  
41 [18] Kamath MG, Pai CG, Kamath A, Kurien A. Monocyte chemoattractant protein-1,  
42 transforming growth factor- $\beta$ 1, nerve growth factor, resistin and hyaluronic acid as  
43 serum markers: comparison between recurrent acute and chronic pancreatitis.  
44 *Hepatobiliary Pancreat Dis Int* 2016;15:209–15. doi:10.1016/S1499-3872(15)60029-  
45 7.  
46  
47  
48  
49  
50  
51  
52  
53  
54  
55  
56  
57  
58  
59  
60

1  
2  
3  
4  
5  
6  
7  
8  
9  
10  
11  
12  
13  
14  
15  
16  
17  
18  
19  
20  
21  
22  
23  
24  
25  
26  
27  
28  
29  
30  
31  
32  
33  
34  
35  
36  
37  
38  
39  
40  
41  
42  
43  
44  
45  
46  
47  
48  
49  
50  
51  
52  
53  
54  
55  
56  
57  
58  
59  
60

- [19] Ceyhan GO, Deucker S, Demir IE, Erkan M, Schmelz M, Bergmann F, et al. Neural fractalkine expression is closely linked to pain and pancreatic neuritis in human chronic pancreatitis. *Lab Invest* 2009;89:347–61. doi:10.1038/labinvest.2008.170.
- [20] Ito T. Can measurement of chemokines become useful biological and functional markers of early-stage chronic pancreatitis? *J Gastroenterol* 2007;42:72–7. doi:10.1007/s00535-006-1929-4.
- [21] Bai H, Chen X, Zhang L, Dou X. The effect of sulindac , a non-steroidal anti-inflammatory drug , attenuates inflammation and fibrosis in a mouse model of chronic pancreatitis 2012.
- [22] Roeb E. Matrix metalloproteinases and liver fibrosis (translational aspects). *Matrix Biol* 2017. doi:10.1016/j.matbio.2017.12.012.
- [23] Kurzepa J, M A, Czechowska G, Kurzepa J, Celiński K, Kazmierak W, et al. Role of MMP-2 and MMP-9 and their natural inhibitors in liver fibrosis, chronic pancreatitis and non-specific inflammatory bowel diseases. *Hepatobiliary Pancreat Dis Int* 2014;13:570–9. doi:10.1016/S1499-3872(14)60261-7.
- [24] Descamps FJ, Van den Steen PE, Martens E, Ballaux F, Geboes K, Opdenakker G. Gelatinase B is diabetogenic in acute and chronic pancreatitis by cleaving insulin. *FASEB J* 2003;17:887–9. doi:10.1096/fj.02-0725fje.
- [25] Tandon RK, Garg PK. Oxidative Stress in Chronic Pancreatitis: Pathophysiological Relevance and Management. *Antioxid Redox Signal* 2011;15:2757–66. doi:10.1089/ars.2011.4115.
- [26] Uden S, Bilton D, Nathan L, Hunt LP, Main C, Braganza JM. Antioxidant therapy for recurrent pancreatitis: placebo-controlled trial. *Aliment Pharmacol Ther* 1990;4:357–71.
- [27] Bhardwaj P, Garg PK, Maulik SK, Saraya A, Tandon RK, Acharya SK. A randomized controlled trial of antioxidant supplementation for pain relief in patients with chronic pancreatitis. *Gastroenterology* 2009;136:149–159.e2.
- [28] Forsmark CE, Liddle RA. The challenging task of treating painful chronic pancreatitis. *Gastroenterology* 2012;143:533–5.
- [29] Siriwardena AK, Mason JM, Sheen AJ, Makin AJ, Shah NS. Antioxidant therapy does not reduce pain in patients with chronic pancreatitis: the ANTICIPATE study. *Gastroenterology* 2012;143:655–63.e1. doi:10.1053/j.gastro.2012.05.046.

- 1  
2  
3  
4 [30] Bopanna S, Nayak B, Prakash S, Shalimar, Mahapatra SJ, Garg PK. Increased  
5 oxidative stress and deficient antioxidant levels may be involved in the pathogenesis  
6 of idiopathic recurrent acute pancreatitis. *Pancreatology* 2017;17:529–33.  
7 doi:10.1016/j.pan.2017.06.009.  
8  
9  
10  
11 [31] Poulsen JL, Olesen SS, Malver LP, Frokjaer JB, Drewes AM. Pain and chronic  
12 pancreatitis: a complex interplay of multiple mechanisms. *World J Gastroenterol*  
13 2013;19:7282–91. doi:10.3748/wjg.v19.i42.7282.  
14  
15  
16 [32] Bouwense SA, de Vries M, Schreuder LT, Olesen SS, Frokjaer JB, Drewes AM, et  
17 al. Systematic mechanism-orientated approach to chronic pancreatitis pain. *World J*  
18 *Gastroenterol* 2015;21:47–59. doi:10.3748/wjg.v21.i1.47.  
19  
20  
21 [33] Olesen SS, Graversen C, Bouwense SAW, van Goor H, Wilder-Smith OHG, Drewes  
22 AM. Quantitative sensory testing predicts pregabalin efficacy in painful chronic  
23 pancreatitis. *PLoS One* 2013;8:e57963. doi:10.1371/journal.pone.0057963.  
24  
25  
26 [34] Schneider A, Löhr JM, Singer M V. The M-ANNHEIM classification of chronic  
27 pancreatitis: Introduction of a unifying classification system based on a review of  
28 previous classifications of the disease. *J Gastroenterol* 2007;42:101–19.  
29 doi:10.1007/s00535-006-1945-4.  
30  
31  
32 [35] Banks P a, Bollen TL, Dervenis C, Gooszen HG, Johnson CD, Sarr MG, et al.  
33 Classification of acute pancreatitis--2012: revision of the Atlanta classification and  
34 definitions by international consensus. *Gut* 2013;62:102–11. doi:10.1136/gutjnl-  
35 2012-302779.  
36  
37  
38  
39  
40 [36] Kalaria R, Abraham P, Desai DC, Joshi A, Gupta T, Abraham P. Rate of recurrence  
41 in Indian patients presenting with acute pancreatitis and identification of chronicity  
42 on follow up : Possible risk factors for progression 2018:10–5.  
43  
44  
45 [37] Sankaran SJ, Xiao AY, Wu LM, Windsor JA, Forsmark CE, Petrov MS. Frequency of  
46 Progression from Acute to Chronic Pancreatitis and Risk Factors: A Meta-analysis.  
47 *Gastroenterology* 2015;149:1490–1500.e1. doi:10.1053/j.gastro.2015.07.066.  
48  
49  
50 [38] Tirkes T, Shah ZK, Takahashi N, Grajo JR, Chang ST, Venkatesh SK, et al;  
51 Consortium for the Study of Chronic Pancreatitis, Diabetes, and Pancreatic Cancer.  
52 Reporting Standards for Chronic Pancreatitis by Using CT, MRI, and MR  
53 Cholangiopancreatography. *Radiology*. 2019 Jan;290(1):207-215. doi:  
54 10.1148/radiol.2018181353.  
55  
56  
57  
58  
59  
60

1  
2  
3  
4  
5  
6  
7  
8  
9  
10  
11  
12  
13  
14  
15  
16  
17  
18  
19  
20  
21  
22  
23  
24  
25  
26  
27  
28  
29  
30  
31  
32  
33  
34  
35  
36  
37  
38  
39  
40  
41  
42  
43  
44  
45  
46  
47  
48  
49  
50  
51  
52  
53  
54  
55  
56  
57  
58  
59  
60

- [39] Yadav D, Park WG, Fogel EL, Li L, Chari ST, Feng Z, et al; Consortium for the Study of Chronic Pancreatitis, Diabetes, and Pancreatic Cancer (CPDPC). PROspective Evaluation of Chronic Pancreatitis for EpidEmiologic and Translational StuDies: Rationale and Study Design for PROCEED From the Consortium for the Study of Chronic Pancreatitis, Diabetes, and Pancreatic Cancer. *Pancreas*. 2018 Nov/Dec;47(10):1229-1238. doi: 10.1097/MPA.0000000000001170.
- [40] Schreyer AG, Jung M, Riemann JF, Niessen C, Pregler B, Grenacher L, et al. S3 guideline for chronic pancreatitis - Diagnosis, classification and therapy for the radiologist. *RoFo Fortschritte Auf Dem Gebiet Der Rontgenstrahlen Und Der Bildgeb Verfahren* 2004;186:1002–8. doi:10.1055/s-0034-1385005.
- [41] Kuwahara T, Hirooka Y, Kawashima H, Ohno E, Ishikawa T, Kawai M, et al. Quantitative diagnosis of chronic pancreatitis using EUS elastography. *J Gastroenterol* 2017;52:868–74. doi:10.1007/s00535-016-1296-8.
- [42] Madzak A, Olesen SS, Lykke Poulsen J, Bolvig Mark E, Mohr Drewes A, Frøkjær JB. MRI assessed pancreatic morphology and exocrine function are associated with disease burden in chronic pancreatitis. *Eur J Gastroenterol Hepatol* 2017;29. doi:10.1097/MEG.0000000000000955.
- [43] Aaronson NK, Ahmedzai S, Bergman B, Bullinger M, Cull A, Duez NJ, et al. The European Organization for Research and Treatment of Cancer QLQ-C30: a quality-of-life instrument for use in international clinical trials in oncology. *J Natl Cancer Inst* 1993;85:365–76.
- [44] Fitzsimmons D, Kahl S, Butturini G, Van Wyk M, Bornman P, Bassi C, et al. Symptoms and quality of life in chronic pancreatitis assessed by structured interview and the EORTC QLQ-C30 and QLQ-PAN26. *Am J Gastroenterol* 2005;100:918–26. doi:10.1111/j.1572-0241.2005.40859.x.
- [45] Mendoza T, Mayne T, Rublee D, Cleeland C. Reliability and validity of a modified Brief Pain Inventory short form in patients with osteoarthritis. *Eur J Pain* 2006;10:353–61. doi:10.1016/j.ejpain.2005.06.002.

## Tables

Table 1. Schedule of Events.

|  |                                                                           | On<br>inclusion | Yearly | Every second<br>year |
|--|---------------------------------------------------------------------------|-----------------|--------|----------------------|
|  |                                                                           | X               |        |                      |
|  |                                                                           | X               | X      |                      |
|  | Physical examination                                                      | X               | X      |                      |
|  | Anthropometrics                                                           | X               | X      |                      |
|  | Vital Signs                                                               | X               | X      |                      |
|  | Clinical Lab and Biobank                                                  | X               | X      |                      |
|  | F-elastase-1 and HbA <sub>1c</sub>                                        | X               | X      |                      |
|  | Advanced MRI                                                              | X               |        | X                    |
|  | Diagnostic Imaging                                                        | X               |        | X                    |
|  | Contrast enhanced EUS and elastography                                    | X               |        | X                    |
|  | Pain Processing                                                           | X               | X      |                      |
|  | Quantitative Sensory Testing                                              | X               | X      |                      |
|  | Questionnaires                                                            | X               | X      |                      |
|  | Body composition: Bioelectrical impedance                                 | X               | X      |                      |
|  | Muscle strength and function: Hand grip strength and timed up and go test | X               | X      |                      |

1  
2  
3  
4  
5  
6  
7  
8  
9  
10  
11  
12  
13  
14  
15  
16  
17  
18  
19  
20  
21  
22  
23  
24  
25  
26  
27  
28  
29  
30  
31  
32  
33  
34  
35  
36  
37  
38  
39  
40  
41  
42  
43  
44  
45  
46  
47  
48  
49  
50  
51  
52  
53  
54  
55  
56  
57  
58  
59  
60

Table 2. Imaging assessment parameters.

| <b>Method</b> | <b>Modality</b>   | <b>Measurement variables</b>                                                             |
|---------------|-------------------|------------------------------------------------------------------------------------------|
| MRI           | T1, T2, MRCP      | Cambridge classification with modification for MRCP [40]                                 |
|               |                   | Main pancreatic duct diameter                                                            |
|               |                   | Pancreatic dimensions and volume                                                         |
|               | DWI               | Apparent diffusion coefficient (ADC)                                                     |
|               | DIXON             | Fat signal fraction (FSF)                                                                |
| EUS           | EUS B-mode        | Rosemont score [12]                                                                      |
|               | Contrast enhanced | 90 sec film recorded from stomach of pancreatic body will be recorded for later analysis |
|               | Elastography      | Histogram analysis and measurement of strain ratio [41]                                  |

Table 3. Circulating biomarker assessment parameters.

|                         | <b>Measurement variable</b>                                                                                                                 |
|-------------------------|---------------------------------------------------------------------------------------------------------------------------------------------|
| <b>Inflammation</b>     | Interleukin(IL)-4, IL-6, IL-8, IL-10, IL-12, IL-18, TNF-alpha<br>Transforming growth factor beta-1 (TGF-β1), Soluble fractalkine (s-Fr),    |
| <b>Fibrosis</b>         | Monocyte chemoattractant protein 1 (MCP-1), Matrix metalloproteinases (MMPs)                                                                |
| <b>Oxidative stress</b> | Glutathione peroxidase, Vitamin C, Ferric reducing ability of plasma, Malondialdehyde, 4-hydroxynonenal, superoxide dismutase, nitric oxide |



Table 4. Nutritional and QST assessment parameters

|                                      | <b>Method</b>                             | <b>Measurement variable</b>                                                                                 |
|--------------------------------------|-------------------------------------------|-------------------------------------------------------------------------------------------------------------|
| <b>Nutritional assessment</b>        | Muscle strength: Hand held dynamometer    | Muscle strength (kg)                                                                                        |
|                                      | Muscle function: Timed up and go test     | Seconds                                                                                                     |
|                                      | Body composition: Bioelectrical impedance | Various bioelectrical impedance parameters                                                                  |
| <b>Assessment of pain processing</b> | Pressure algometry                        | Pressure pain and tolerance thresholds (kPa)                                                                |
|                                      | Temporal summation                        | Absolute and relative change in pain scores (NRS) to single and repetitive pinprick stimulations            |
|                                      | Conditioned pain modulation               | Absolute and relative change in pressure pain tolerance thresholds (kPa) before and after cold pressor test |

1  
2  
3  
4 **Figure legend**  
5

6 Figure 1. A large proportion of patients develop CP after an episode of acute pancreatitis.

7  
8 The development of CP is associated with continued or recurrent inflammation and  
9 progressive development of fibrosis.  
10  
11  
12  
13  
14  
15  
16  
17  
18  
19  
20  
21  
22  
23  
24  
25  
26  
27  
28  
29  
30  
31  
32  
33  
34  
35  
36  
37  
38  
39  
40  
41  
42  
43  
44  
45  
46  
47  
48  
49  
50  
51  
52  
53  
54  
55  
56  
57  
58  
59  
60

For peer review only

1  
2  
3  
4  
5  
6  
7  
8  
9  
10  
11  
12  
13  
14  
15  
16  
17  
18  
19  
20  
21  
22  
23  
24  
25  
26  
27  
28  
29  
30  
31  
32  
33  
34  
35  
36  
37  
38  
39  
40  
41  
42  
43  
44  
45  
46  
47  
48  
49  
50  
51  
52  
53  
54  
55  
56  
57  
58  
59  
60



Figure
